# Supplementary material for: Membrane Permeability and Aqueous Stability Study of Linear and Cyclic Diarylheptanoids from Corylus maxima
Source: MDPI journal article supplement (doi:10.3390/pharmaceutics14061250), 2022-06-12
Supplement: s1 [file s1]

# Supplementary Materials: Membrane Permeability and Aqueous Stability Study of Linear and Cyclic Diarylheptanoids from *Corylus maxima*

Csenge Anna Felegyi-Tóth, Zsófia Tóth, Zsófia Garádi, Imre Boldizsár, Andrea Nagyné Nedves, Alexandra Simon, Kristóf Felegyi, Ágnes Alberti and Eszter Riethmüller

**Table S1.** UHPLC-DAD method validation: linearity, LOD and LOQ values.

| Compound                                  | Regression Equation | Weight Factor    | R <sup>2</sup> | Regression Range (μM) | LOD (μM) | LOQ (μM) |
|-------------------------------------------|---------------------|------------------|----------------|-----------------------|----------|----------|
| hirsutanonol-5-O-β-D-glucopyranoside (1)  | y=2203.16x-495.38   | 1/x <sup>2</sup> | 0.9999         | 0.5-100               | 0.14     | 0.45     |
| oregonin (2)                              | y=4417.70x-555.09   | -                | 1.0000         | 0.5-100               | 0.12     | 0.4      |
| hirsutenone (3)                           | y=27927.05x+1536.21 | -                | 0.9996         | 0.5-100               | 0.04     | 0.13     |
| platyphyllonol-5-O-β-D-xylopyranoside (4) | y=1073.90x+22.67    | 1/x <sup>2</sup> | 0.9994         | 0.5-100               | 0.15     | 0.5      |
| platyphyllenone (5)                       | y=14650.51x-1011.18 | 1/x <sup>2</sup> | 0.9999         | 0.5-100               | 0.05     | 0.15     |
| alnusonol-11-O-β-D-glucopyranoside (6)    | y=6145.06-710.82    | 1/x <sup>2</sup> | 1.0000         | 0.5-100               | 0.03     | 0.1      |
| alnusone (7)                              | y=6217.00x+125.05   | -                | 1.0000         | 0.5-100               | 0.03     | 0.1      |
| myricitrin (11)                           | y=20978.24x-1489.97 | 1/x <sup>2</sup> | 0.9994         | 0.5-100               | 0.02     | 0.05     |

**Table S2.** UPLC-DAD system suitability tests: Precision and accuracy.

| Nominal conc. (μM)                               | Precision (RSD%) |          | Accuracy (%) |          |
|--------------------------------------------------|------------------|----------|--------------|----------|
|                                                  | Intraday         | Interday | Intraday     | Interday |
| <b>hirsutanonol-5-O-β-D-glucopyranoside (1)</b>  |                  |          |              |          |
| 100                                              | 0.13             | 0.73     | 100.42       | 99.63    |
| 10                                               | 0.93             | 1.83     | 100.96       | 100.67   |
| 0.5                                              | 0.66             | 2.65     | 99.89        | 111.35   |
| <b>oregonin (2)</b>                              |                  |          |              |          |
| 100                                              | 0.77             | 0.99     | 100.03       | 99.75    |
| 10                                               | 0.96             | 2.03     | 102.15       | 103.43   |
| 0.5                                              | 2.56             | 2.84     | 101.96       | 112.56   |
| <b>hirsutenone (3)</b>                           |                  |          |              |          |
| 100                                              | 0.05             | 2.09     | 101.82       | 110.28   |
| 10                                               | 0.3              | 1.84     | 96.92        | 95.60    |
| 0.5                                              | 0.6              | 1.55     | 100.12       | 100.63   |
| <b>platyphyllonol-5-O-β-D-xylopyranoside (4)</b> |                  |          |              |          |
| 100                                              | 0.11             | 0.18     | 101.53       | 101.73   |
| 10                                               | 0.46             | 0.56     | 98.72        | 103.36   |
| 0.5                                              | 2.12             | 4.94     | 96.97        | 106.8    |
| <b>platyphyllenone (5)</b>                       |                  |          |              |          |
| 100                                              | 1.18             | 1.84     | 105.14       | 107.2    |
| 10                                               | 0.91             | 3.06     | 93.69        | 94.16    |
| 0.5                                              | 3.48             | 8.45     | 103.96       | 101.51   |
| <b>alnusonol-11-O-β-D-glucopyranoside (6)</b>    |                  |          |              |          |
| 100                                              | 0.46             | 0.52     | 98.86        | 104.05   |
| 10                                               | 0.56             | 2.44     | 100.62       | 108.99   |
| 0.5                                              | 1.74             | 2.32     | 98.61        | 109.28   |
| <b>alnusone (7)</b>                              |                  |          |              |          |
| 100                                              | 0.18             | 0.33     | 100.47       | 100.78   |
| 10                                               | 0.19             | 0.42     | 101.20       | 99.17    |
| 0.5                                              | 6.69             | 8.74     | 101.78       | 103.14   |

| myricitrin (11) |      |      |        |        |
|-----------------|------|------|--------|--------|
| 100             | 0.80 | 1.91 | 100.79 | 103.54 |
| 10              | 0.49 | 2.14 | 102.56 | 105.61 |
| 0.5             | 5.71 | 8.24 | 99.01  | 116.82 |

NMR data of compound **1** (hirsutanolol-5-O- $\beta$ -D-glucopyranoside):  $^1\text{H}$  NMR (DMSO- $d_6$ , 600 MHz, 295 K):  $\delta$  6.60 (m, 2H, H-5', H-5''), 6.59 (m, 1H, H-2''), 6.56 (d,  $^4J_{\text{H,H}}=2.0$  Hz, 1H, H-2'), 6.43 (dd,  $^3J_{\text{H,H}}=8.0$  Hz,  $^4J_{\text{H,H}}=2.0$  Hz, 1H, H-6''), 6.40 (dd,  $^3J_{\text{H,H}}=8.0$  Hz,  $^4J_{\text{H,H}}=2.0$  Hz, 1H, H-6'), 4.16 (d,  $^3J_{\text{H,H}}=7.8$  Hz, 1H, H<sub>Glc</sub>-1), 4.04 (m, 1H, H-5), 3.69 (dd,  $^2J_{\text{H,H}}=11.6$  Hz,  $^3J_{\text{H,H}}=1.6$  Hz, 1H, H-Glc-6a), 3.47 (dd,  $^2J_{\text{H,H}}=11.6$  Hz,  $^3J_{\text{H,H}}=5.3$  Hz, 1H, H<sub>Glc</sub>-6b), 3.13 (t,  $^3J_{\text{H,H}}=8.6$  Hz, 1H, H<sub>Glc</sub>-3), 3.08 (m, 1H, H<sub>Glc</sub>-5), 3.06 (m, 1H, H<sub>Glc</sub>-4), 2.91 (t,  $^3J_{\text{H,H}}=8.6$  Hz, 1H, H<sub>Glc</sub>-2), 2.75 (dd,  $^2J_{\text{H,H}}=16.3$  Hz,  $^3J_{\text{H,H}}=6.3$  Hz, 1H, H-4a), 2.69 (m, 2H, H-2), 2.56 (m, 1H, H-4b), 2.45 (m, 1H, H-7a), 2.42 (m, 1H, H-7b), 1.68 (m, 1H, H-6a), 1.62 (m, 1H, H-6b).  $^{13}\text{C}$  NMR (DMSO- $d_6$ , 150 MHz, 295 K):  $\delta$  209.3 (C-3), 145.3 (C-3''), 145.2 (C-3'), 143.5 (C-4'), 143.3 (C-4''), 133.1 (C-1''), 132.1 (C-1'), 119.1 (C-6''), 118.9 (C-6'), 116.1 (C-2''), 115.9 (C-2'), 115.7 (C-5', C-5''), 101.9 (C<sub>Glc</sub>-1), 77.1 (C<sub>Glc</sub>-5), 77.0 (C<sub>Glc</sub>-3), 74.3 (C-5), 73.7 (C<sub>Glc</sub>-2), 70.2 (C<sub>Glc</sub>-4), 61.4 (C<sub>Glc</sub>-6), 47.4 (C-4), 45.0 (C-2), 37.3 (C-6), 30.4 (C-7), 28.6 (C-1).

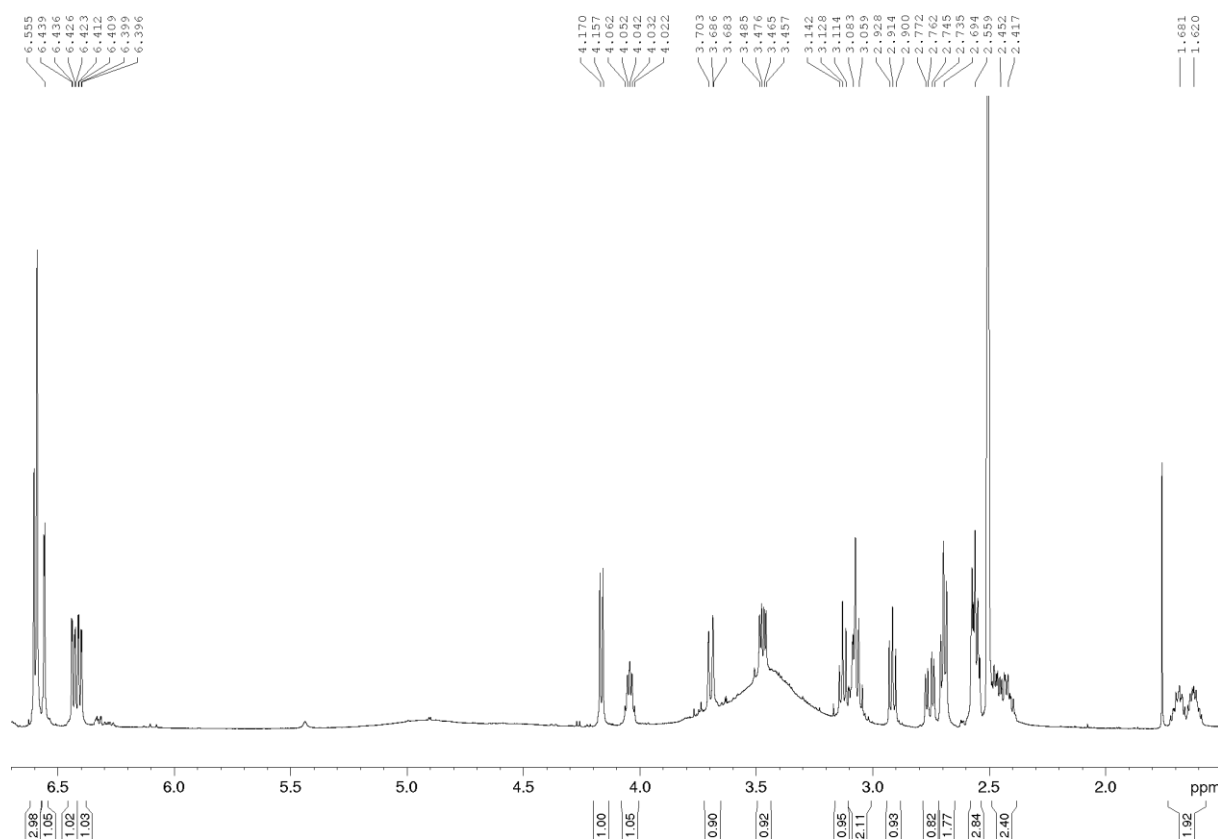

**Figure S1.**  $^1\text{H}$  NMR spectrum of hirsutanolol-5-O- $\beta$ -D-glucopyranoside (**1**) (DMSO- $d_6$ , 295 K).

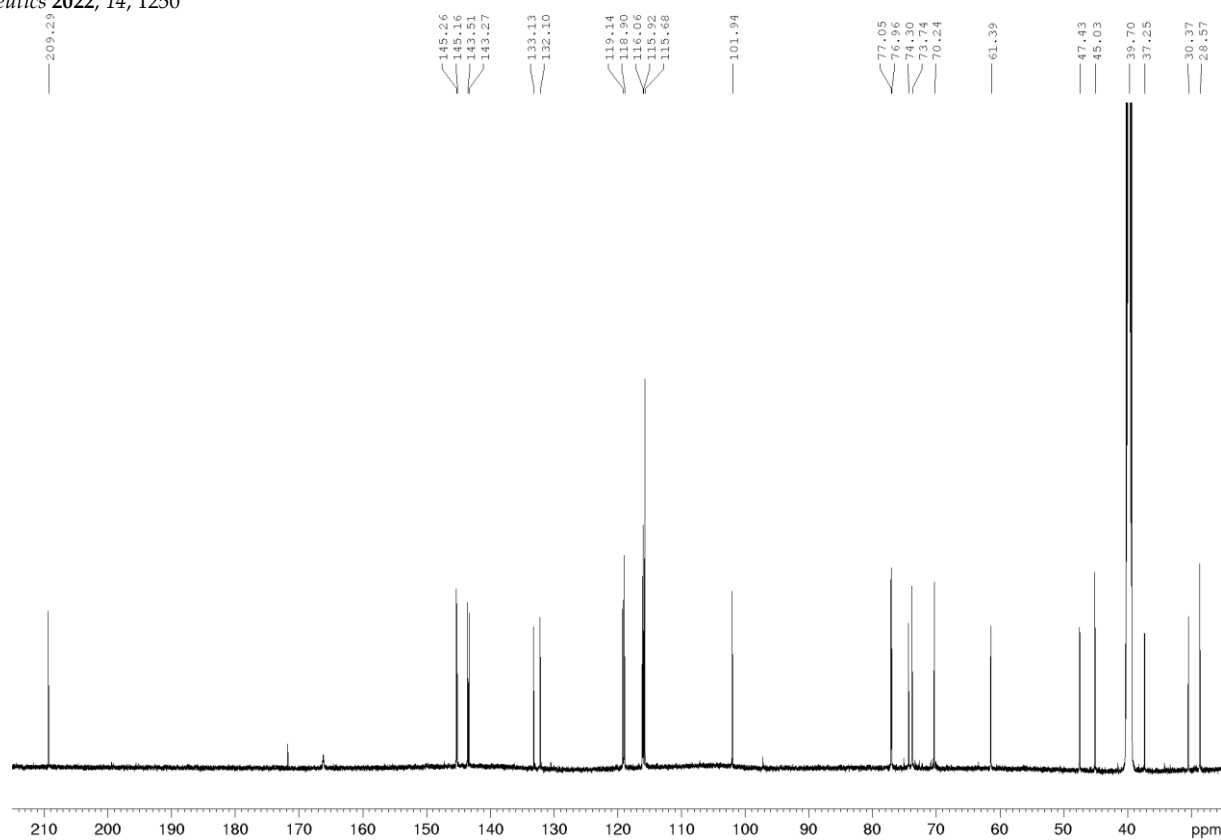

**Figure S2.** <sup>13</sup>C NMR spectrum hirsutanolol-5-O-β-D-glucopyranoside (1) (DMSO-*d*<sub>6</sub>, 295 K).

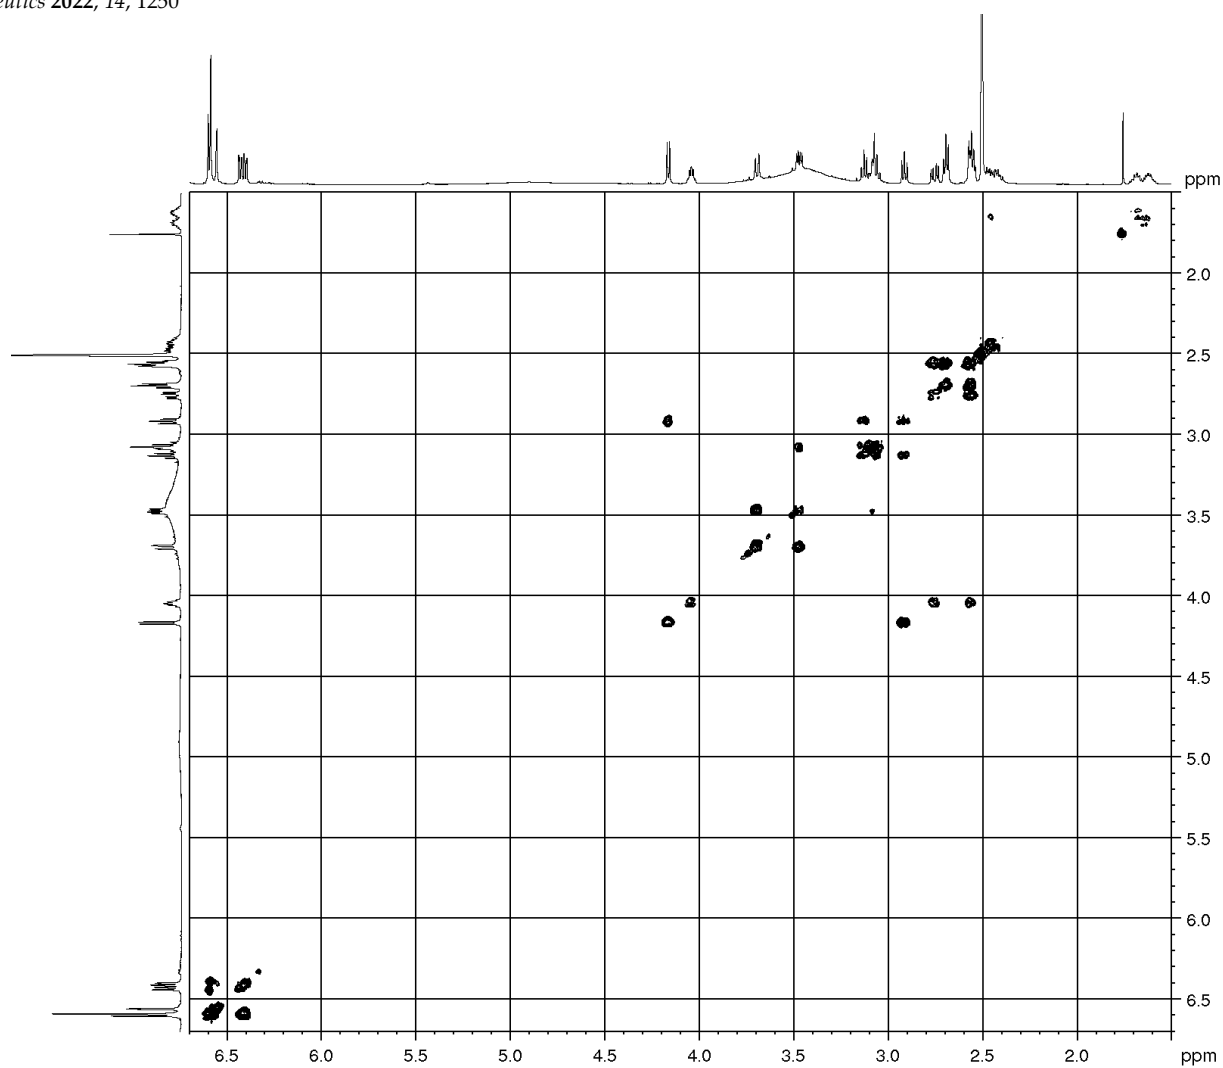

Figure S3. COSY spectrum of hirsutanolol-5-O- $\beta$ -D-glucopyranoside (**1**) (DMSO- $d_6$ ).

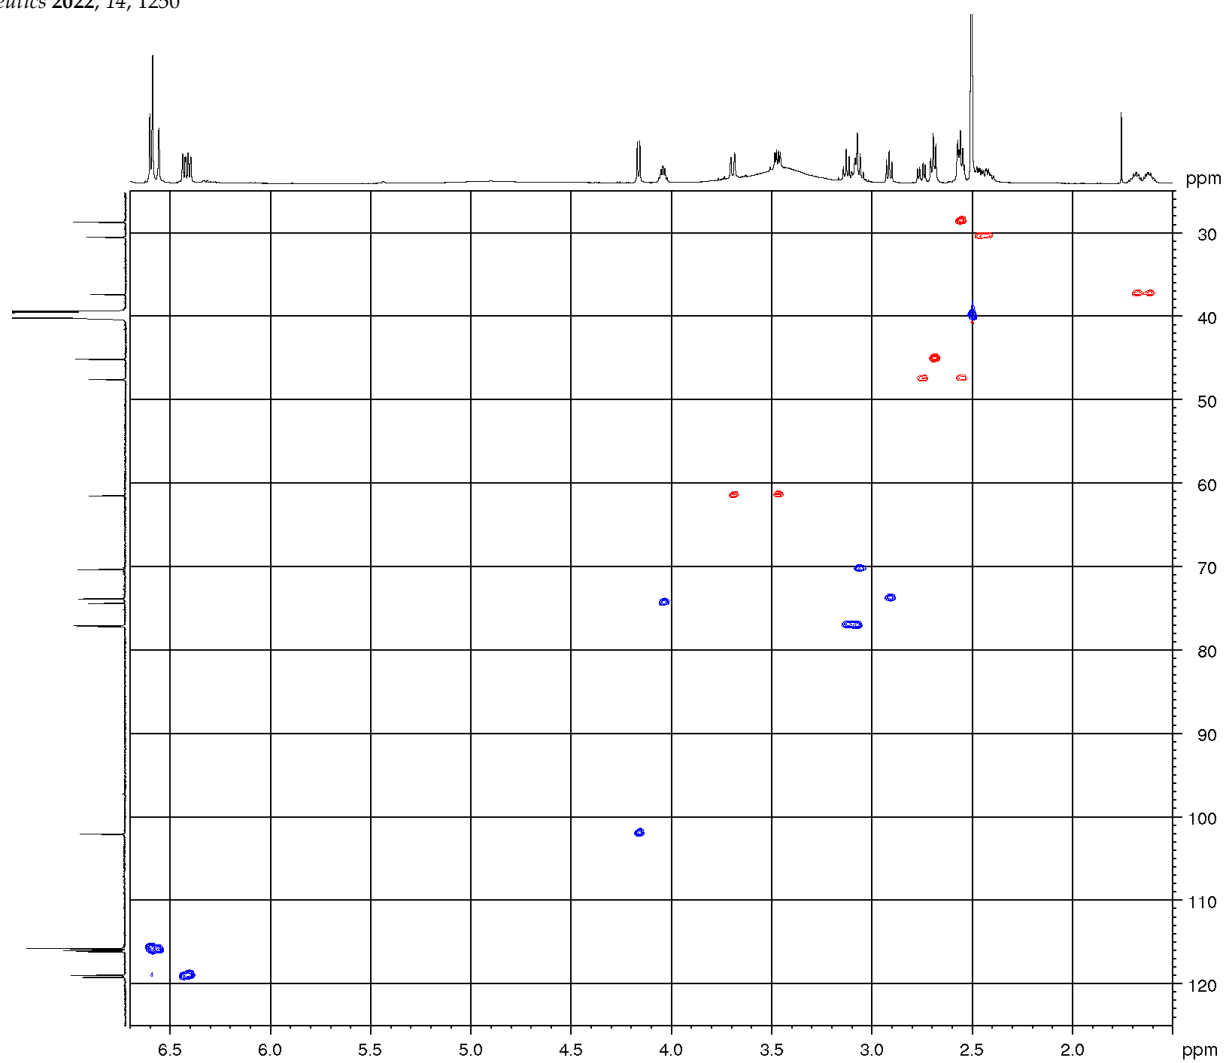

Figure S4. HSQC spectrum of hirsutanolol-5-O- $\beta$ -D-glucopyranoside (**1**) ( $\text{DMSO}-d_6$ , 295 K).

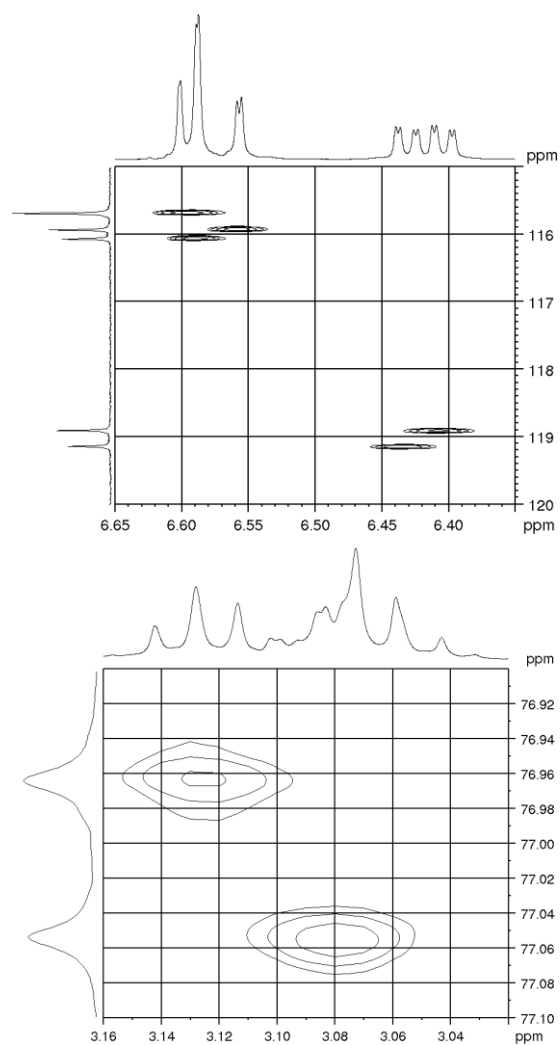

**Figure S5.** Band Selective HSQC spectra of hirsutanolol-5-*O*- $\beta$ -D-glucopyranoside (**1**) (DMSO-*d*<sub>6</sub>, 295 K).

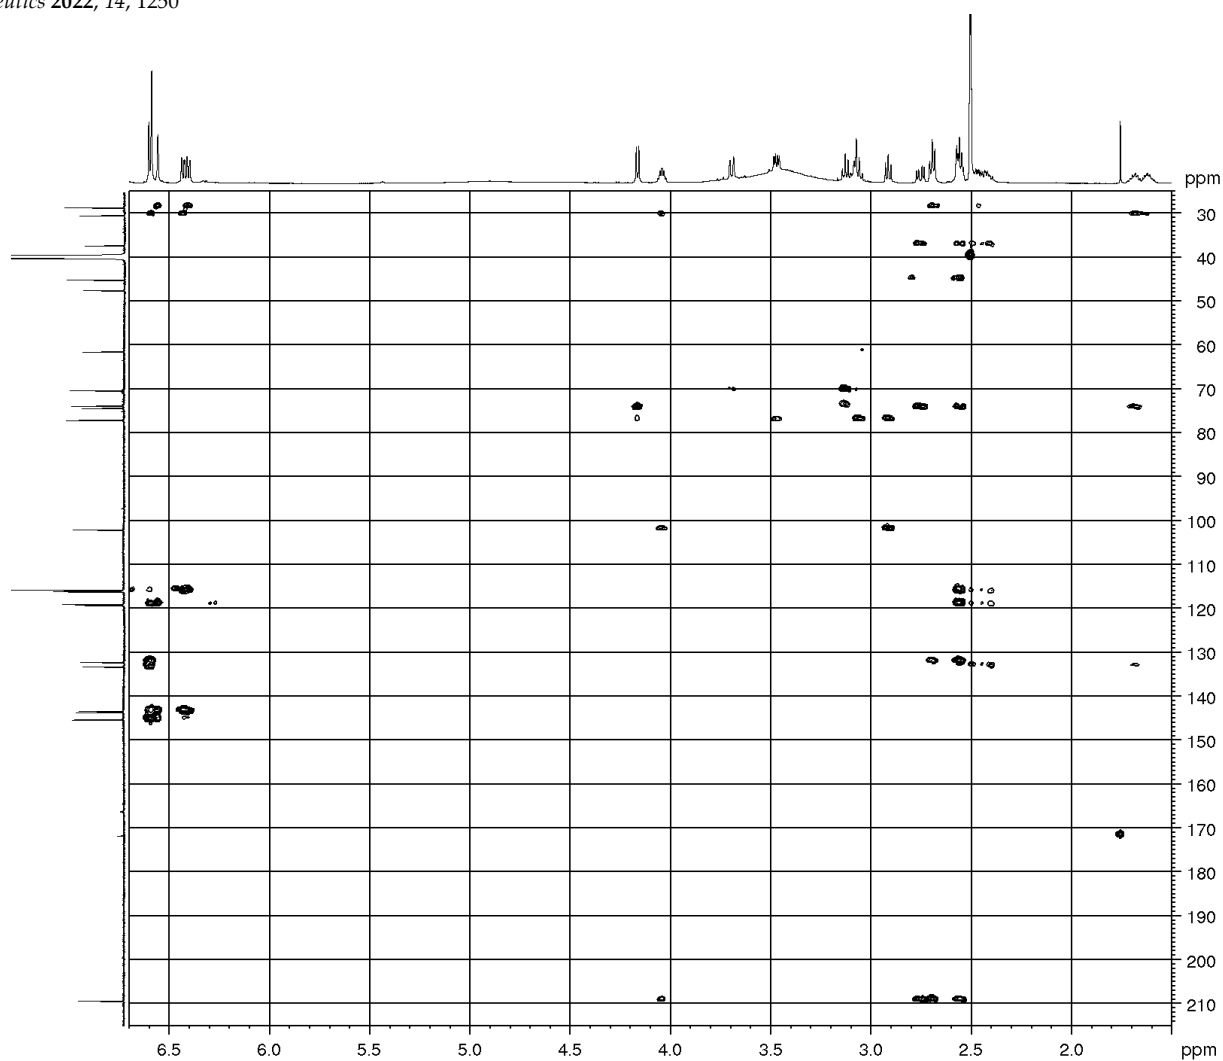

**Figure S6.** HMBC spectrum of hirsutanolol-5-O- $\beta$ -D-glucopyranoside (**1**) (DMSO- $d_6$ , 295 K).

NMR data of compound **4** (platyphyllonol-5-O- $\beta$ -D-xylopyranoside):  $^1\text{H}$  NMR (DMSO- $d_6$ , 600 MHz, 295 K):  $\delta$  9.14 (m, 2H, OH-4', OH-4''), 6.97 (~d,  $^3J_{\text{H,H}}=8.5$  Hz, 2H, H-2', H-6'), 6.94 (~d,  $^3J_{\text{H,H}}=8.5$  Hz, 2H, H-2'', H-6''), 6.64 (m, 4H, H-3', H-5', H-3'', H-5''), 4.94 (m, 3H, OH<sub>Xyl</sub>-2, OH<sub>Xyl</sub>-3, OH<sub>Xyl</sub>-4), 4.12 (d,  $^3J_{\text{H,H}}=7.7$  Hz, 1H, H<sub>Xyl</sub>-1), 3.99 (m, 1H, H-5), 3.68 (dd,  $^2J_{\text{H,H}}=11.4$  Hz,  $^3J_{\text{H,H}}=5.4$  Hz, 1H, H<sub>Xyl</sub>-6a), 3.27 (m, 1H, H<sub>Xyl</sub>-4), 3.07 (t,  $^3J_{\text{H,H}}=8.9$  Hz, 1H, H<sub>Xyl</sub>-3), 3.01 (m, 1H, H<sub>Xyl</sub>-6b), 2.90 (m, 1H, H<sub>Xyl</sub>-2), 2.75 (dd,  $^2J_{\text{H,H}}=16.3$  Hz,  $^3J_{\text{H,H}}=6.3$  Hz, 1H, H-4a), 2.72 (m, 2H, H-2), 2.63 (m, 2H, H-1), 2.56 (m, 1H, H-4b), 2.52 (m, 1H, H-7a), 2.43 (m, 1H, H-7b), 1.63 (m, 2H, H-6).  $^{13}\text{C}$  NMR (DMSO- $d_6$ , 150 MHz, 295 K):  $\delta$  209.1 (C-3), 155.6 (C-4'), 155.4 (C-4''), 132.2 (C-1''), 131.3 (C-1'), 129.3 (C-2', C-6' C-2'', C-6''), 115.2 (C-3', C-5', C-3'', C-5''), 102.7 (C<sub>Xyl</sub>-1), 76.9 (C<sub>Xyl</sub>-3), 74.3 (C-5), 73.5 (C<sub>Xyl</sub>-2), 69.8 (C<sub>Xyl</sub>-4), 66.0 (C<sub>Xyl</sub>-5), 47.4 (C-4), 45.0 (C-2), 37.4 (C-6), 30.2 (C-7), 28.3 (C-1).

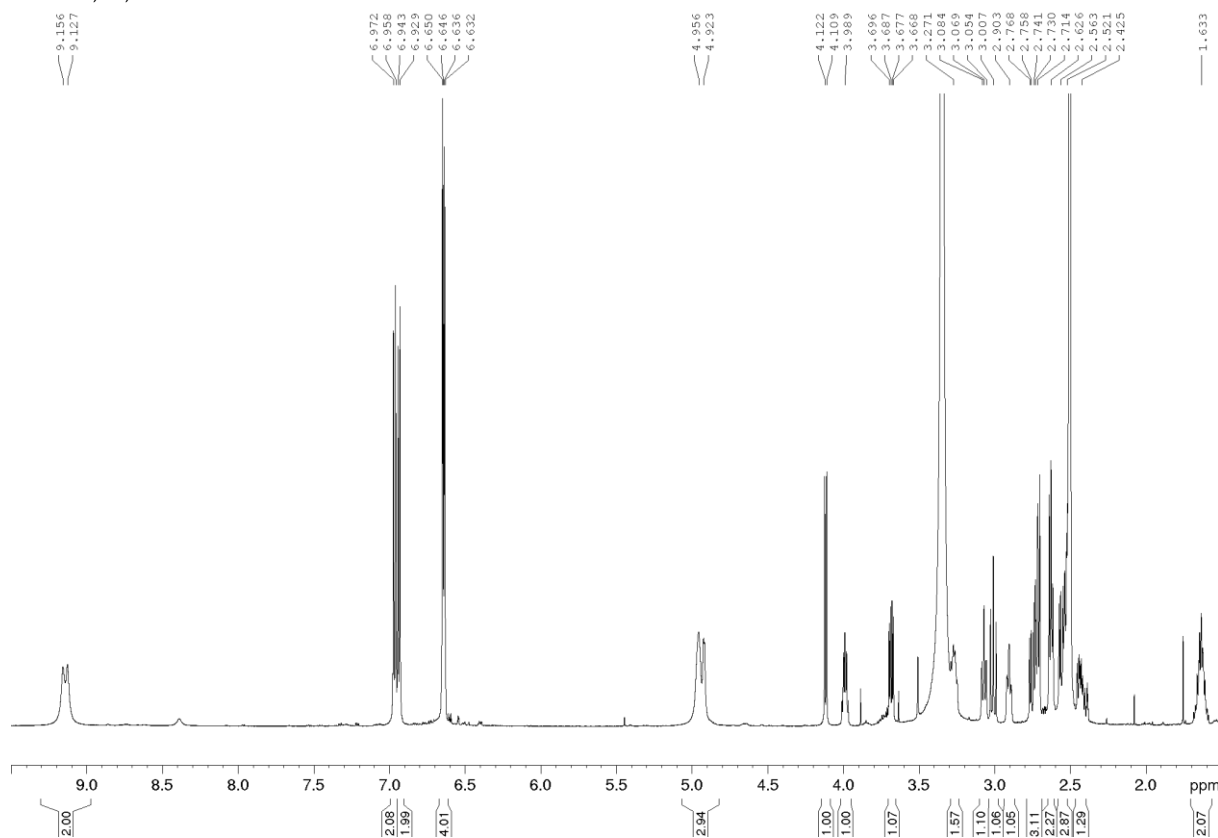

Figure S7. <sup>1</sup>H NMR spectrum of platyphyllonol-5-O-β-D-xylopyranoside (4) (DMSO-*d*<sub>6</sub>, 295 K).

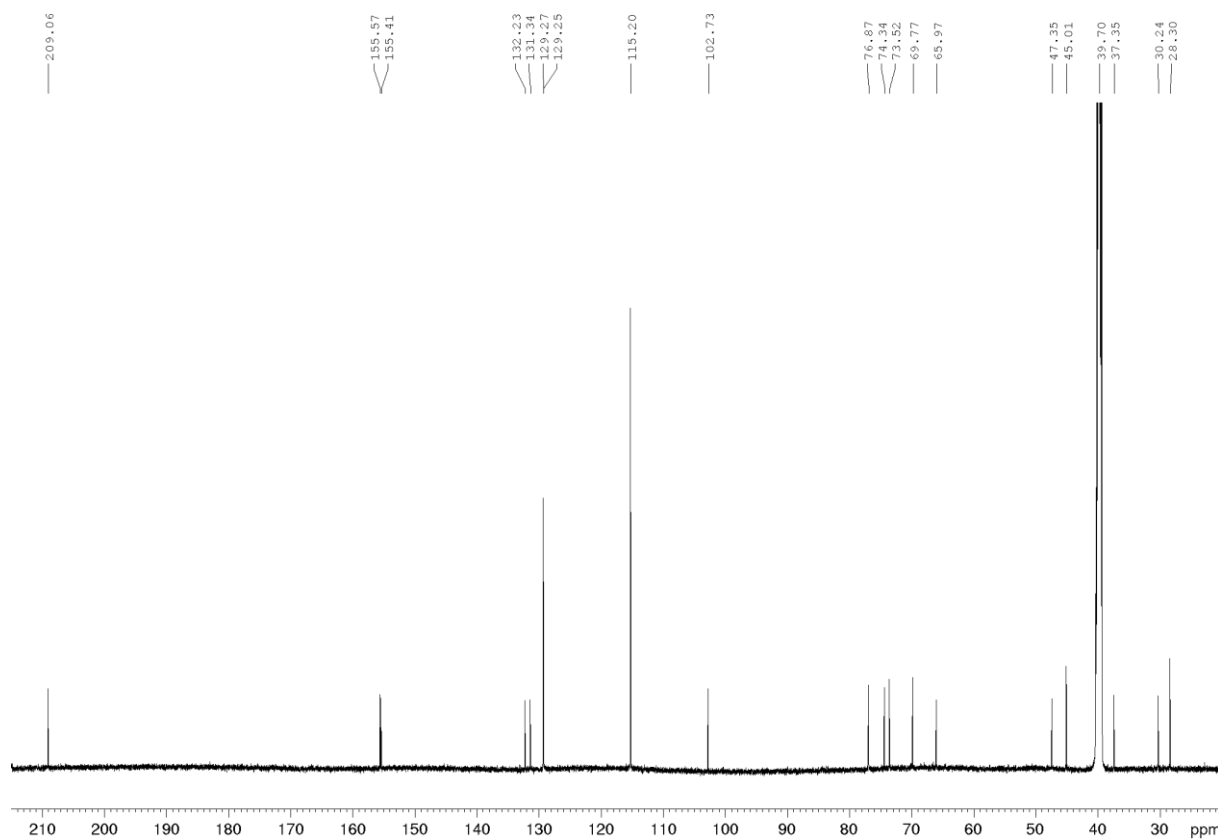

Figure S8. <sup>13</sup>C NMR spectrum of platyphyllonol-5-O-β-D-xylopyranoside (4) (DMSO-*d*<sub>6</sub>, 295 K).

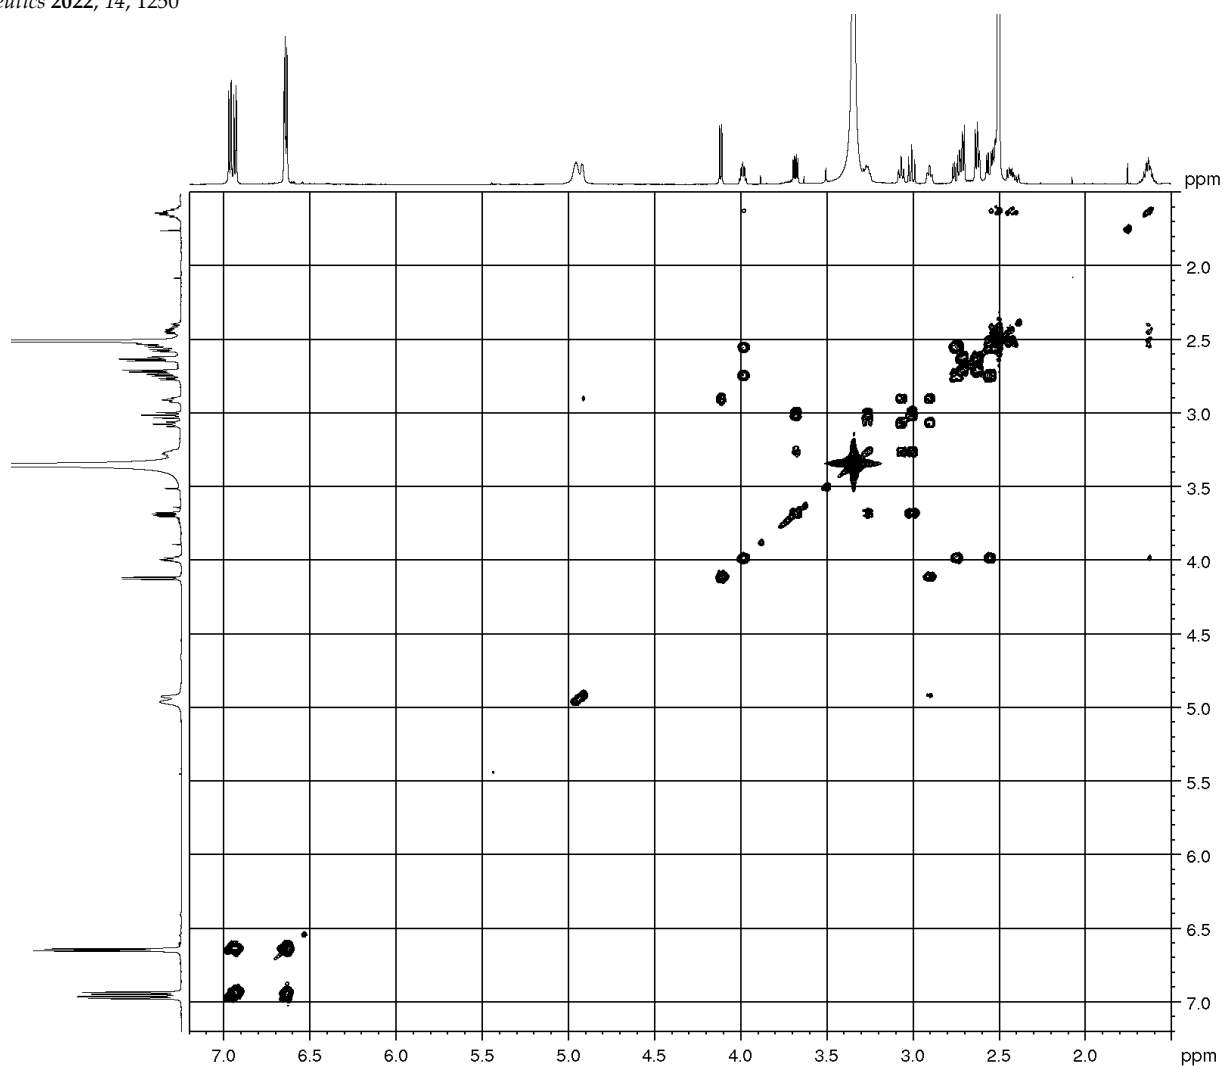

**Figure S9.** COSY spectrum of platyphyllonol-5-O- $\beta$ -D-xylopyranoside (**4**) (DMSO-*d*<sub>6</sub>, 295 K).

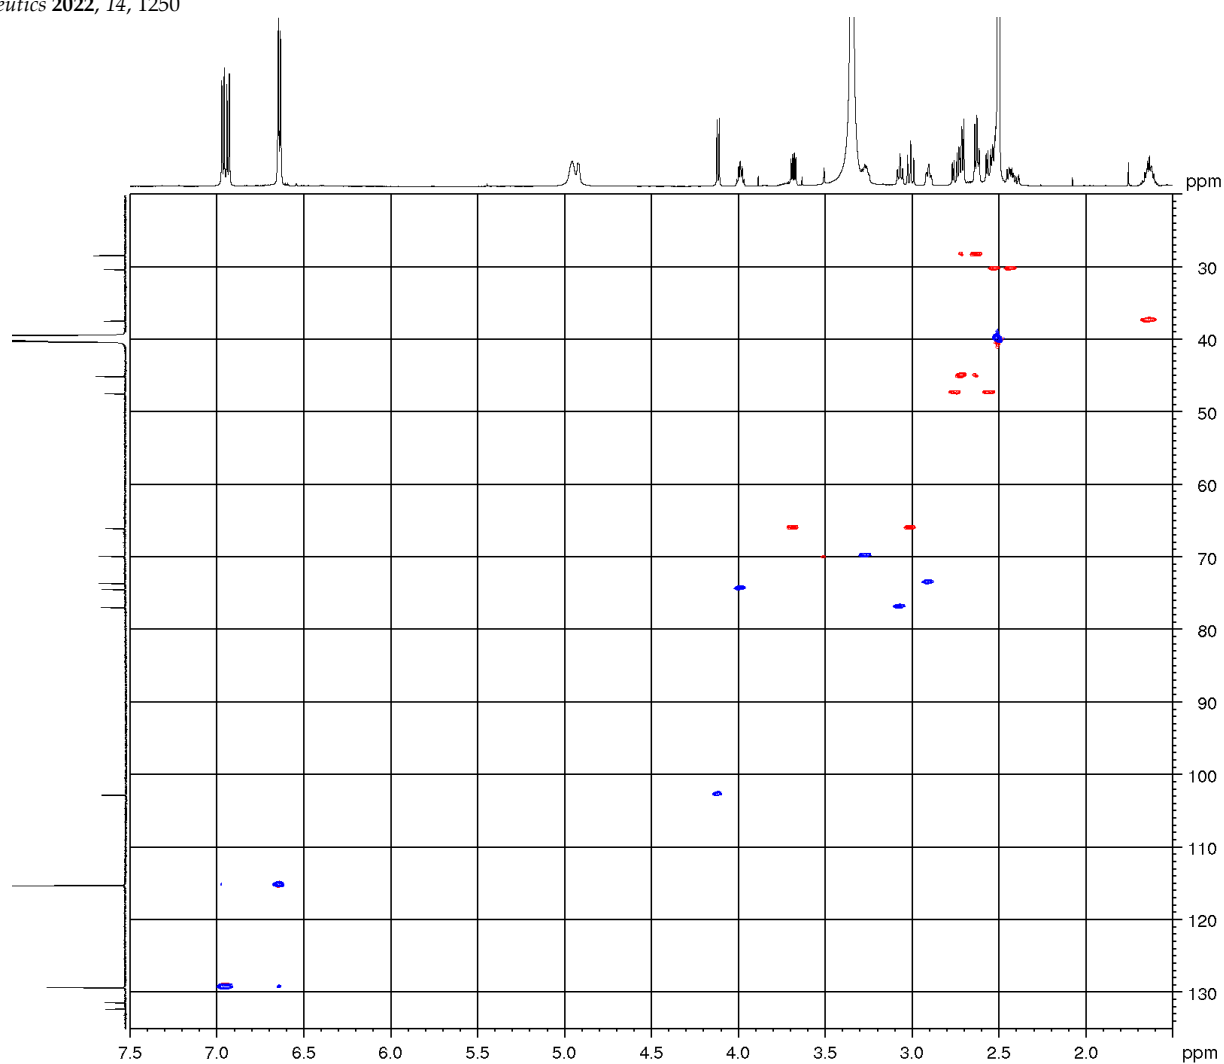

Figure S10. HSQC spectrum of platyphyllonol-5-*O*- $\beta$ -D-xylopyranoside (**4**) (DMSO-*d*<sub>6</sub>, 295 K).

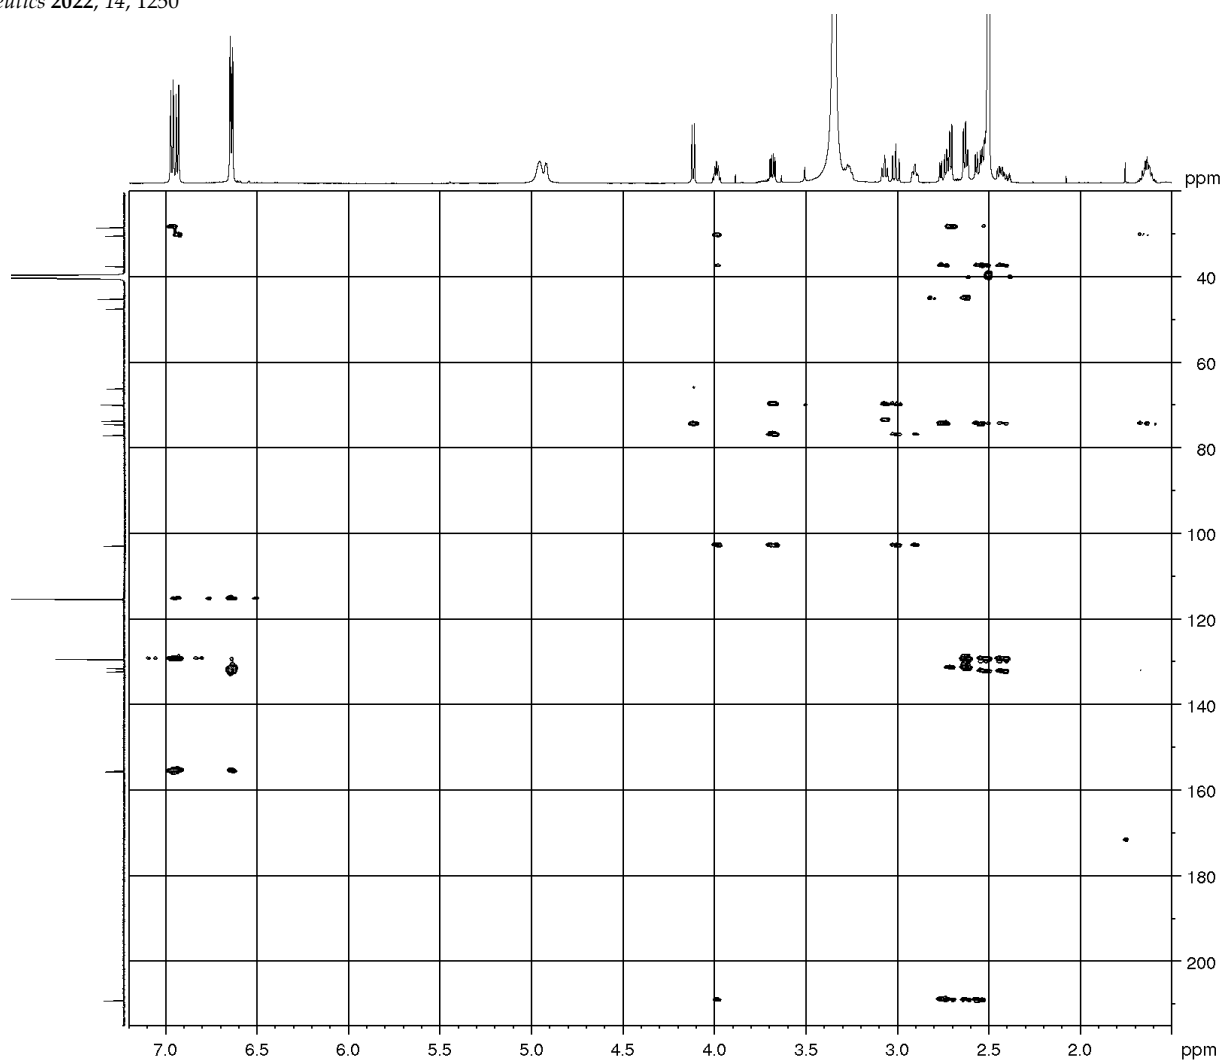

**Figure S11.** HMBC spectrum of platyphyllonol-5-O-β-D-xylopyranoside (4) (DMSO-*d*<sub>6</sub>, 295 K).

NMR data of compound 5 (platyphyllenone): <sup>1</sup>H NMR (DMSO-*d*<sub>6</sub>, 600 MHz, 295 K): δ 7.00 (~d, <sup>3</sup>J<sub>H,H</sub>=8.4 Hz, 2H, H-2'/H-2'', H-6'/H-6''), 6.98 (~d, <sup>3</sup>J<sub>H,H</sub>=8.4 Hz, H-2'/H-2'', H-6'/H-6''), 6.85 (dt, <sup>2</sup>J<sub>H,H</sub>=15.9 Hz, <sup>3</sup>J<sub>H,H</sub>=6.8 Hz, 1H, H-5), 6.67 (~d, <sup>3</sup>J<sub>H,H</sub>=8.4 Hz, 2H, H-3'/H-3'', H-5'/H-5''), 6.65 (~d, <sup>3</sup>J<sub>H,H</sub>=8.4 Hz, 2H H-3'/H-3'', H-5'/H-5''), 6.08 (dt, <sup>2</sup>J<sub>H,H</sub>=15.9 Hz, <sup>4</sup>J<sub>H,H</sub>=1.4 Hz, 1H, H-4), 2.79 (m, 2H, H-2), 2.67 (m, 2H, H-1), 2.62 (m, 2H, H-7), 2.43 (m, 2H, H-6). <sup>13</sup>C NMR (DMSO-*d*<sub>6</sub>, 150 MHz, 295 K): δ 199.5 (C-3), 155.7 (C-4', C-4''), 147.1 (C-5), 131.3 (C-1/C-1''), 131.1 (C-1/C-1''), 130.5 (C-4), 129.4 (C-6'/C-6''), 129.3 (C-6'/C-6''), 115.3 (C-5'/C-5''), 115.2 (C-5'/C-5''), 41.4 (C-2), 34.1 (C-6), 33.0 (C-7), 29.0 (C-1).

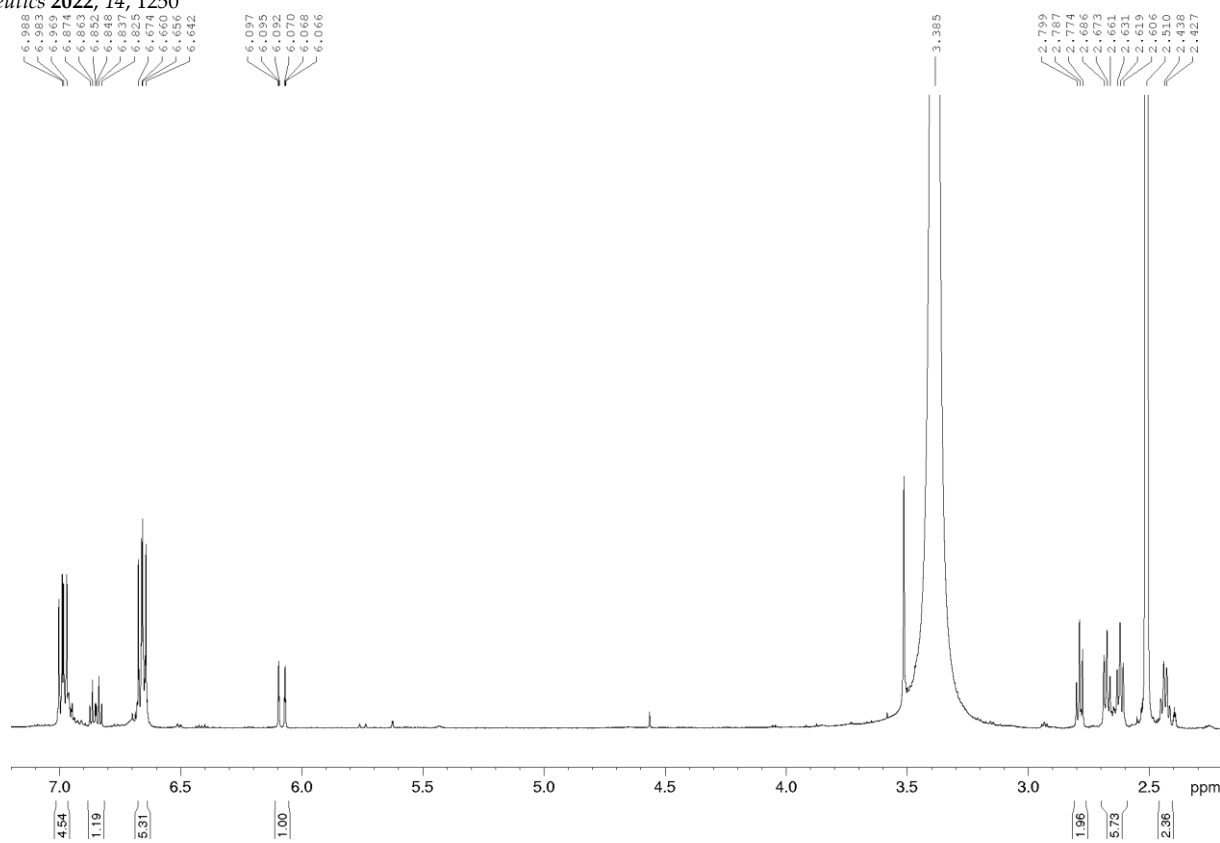

Figure S12. <sup>1</sup>H NMR spectrum of platyphyllenone (5) (DMSO-*d*<sub>6</sub>, 295 K).

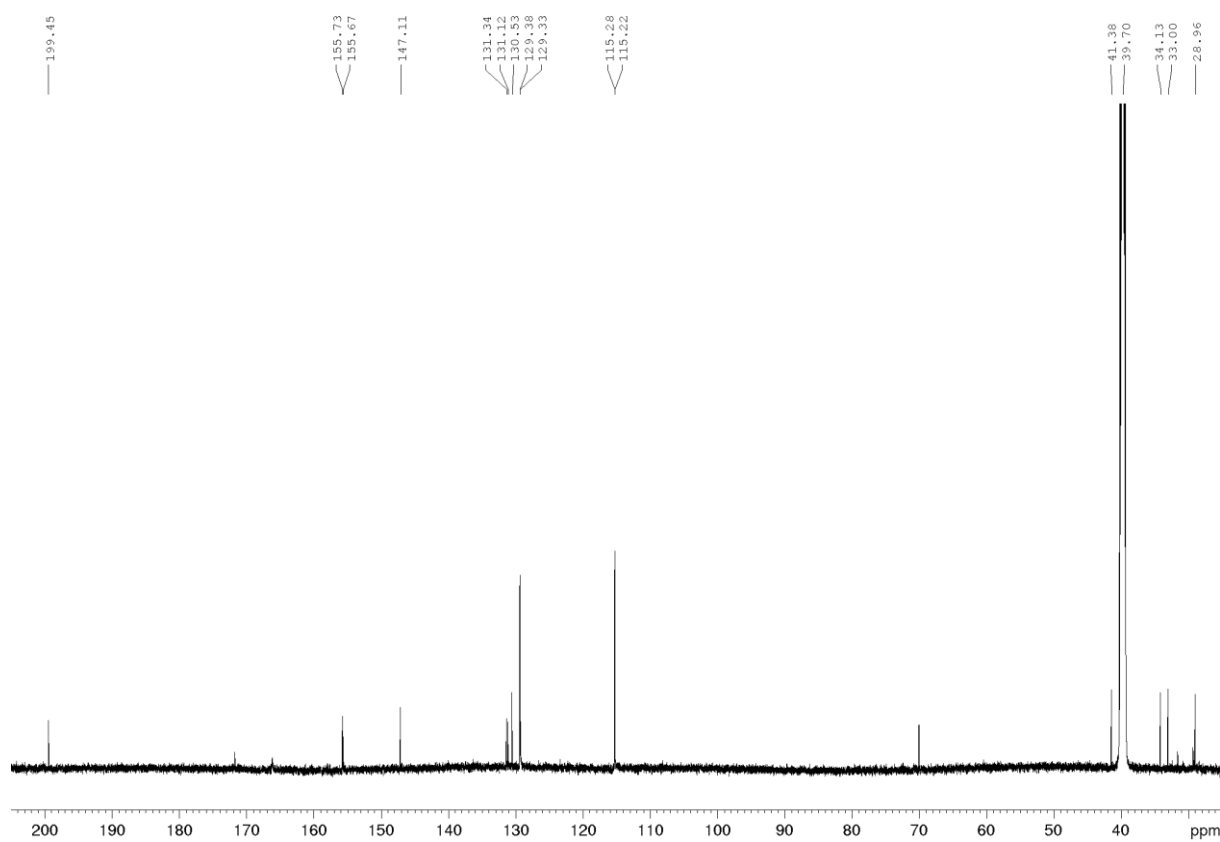

Figure S13. <sup>13</sup>C NMR spectrum of platyphyllenone (5) (DMSO-*d*<sub>6</sub>, 295 K).

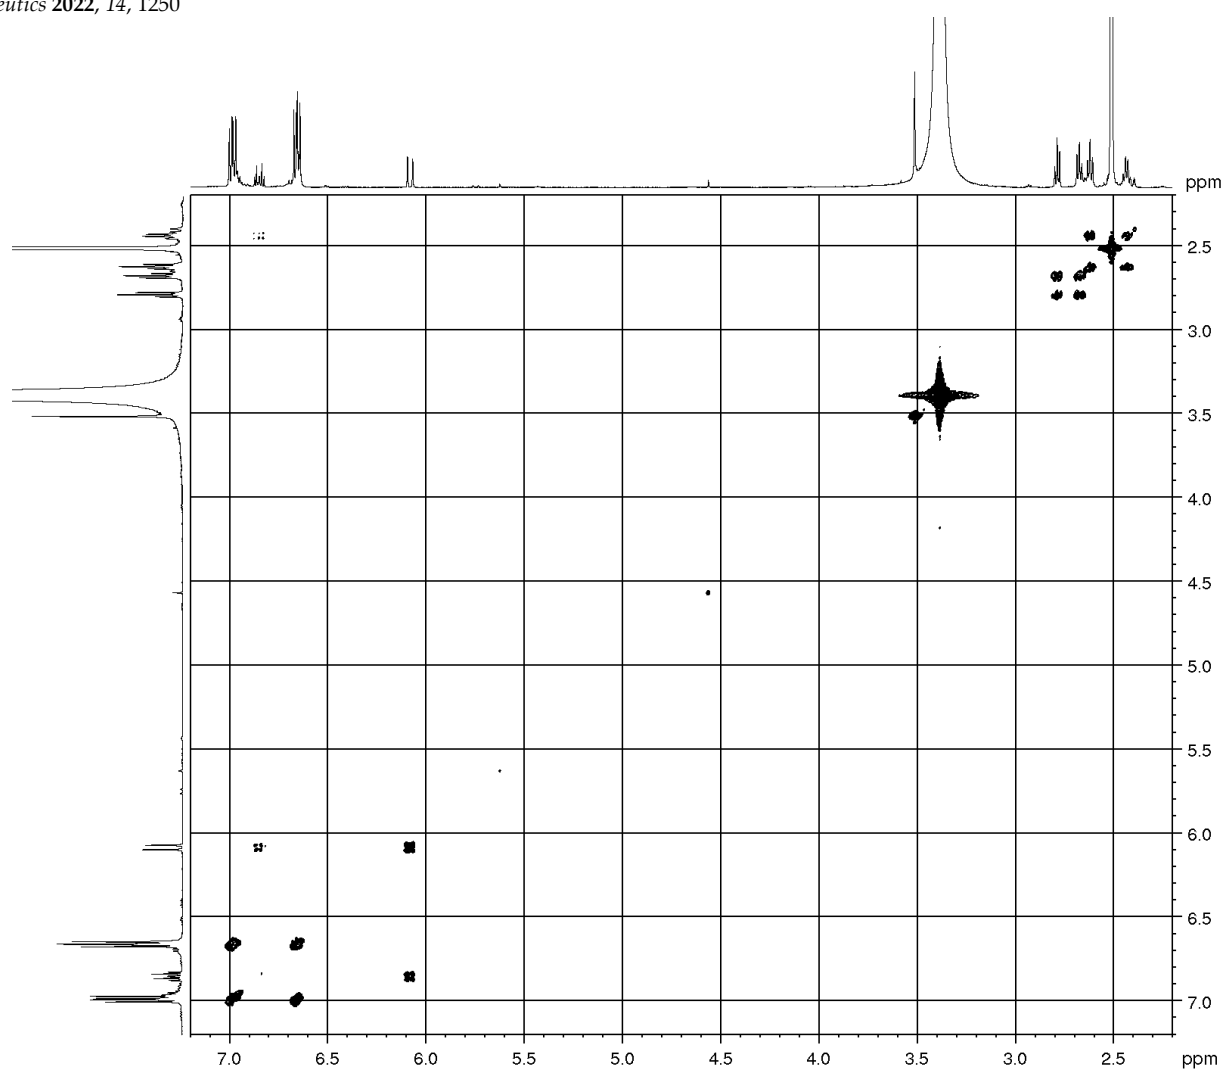

Figure S14. COSY spectrum of platyphyllenone (5) (DMSO-*d*<sub>6</sub>, 295 K).

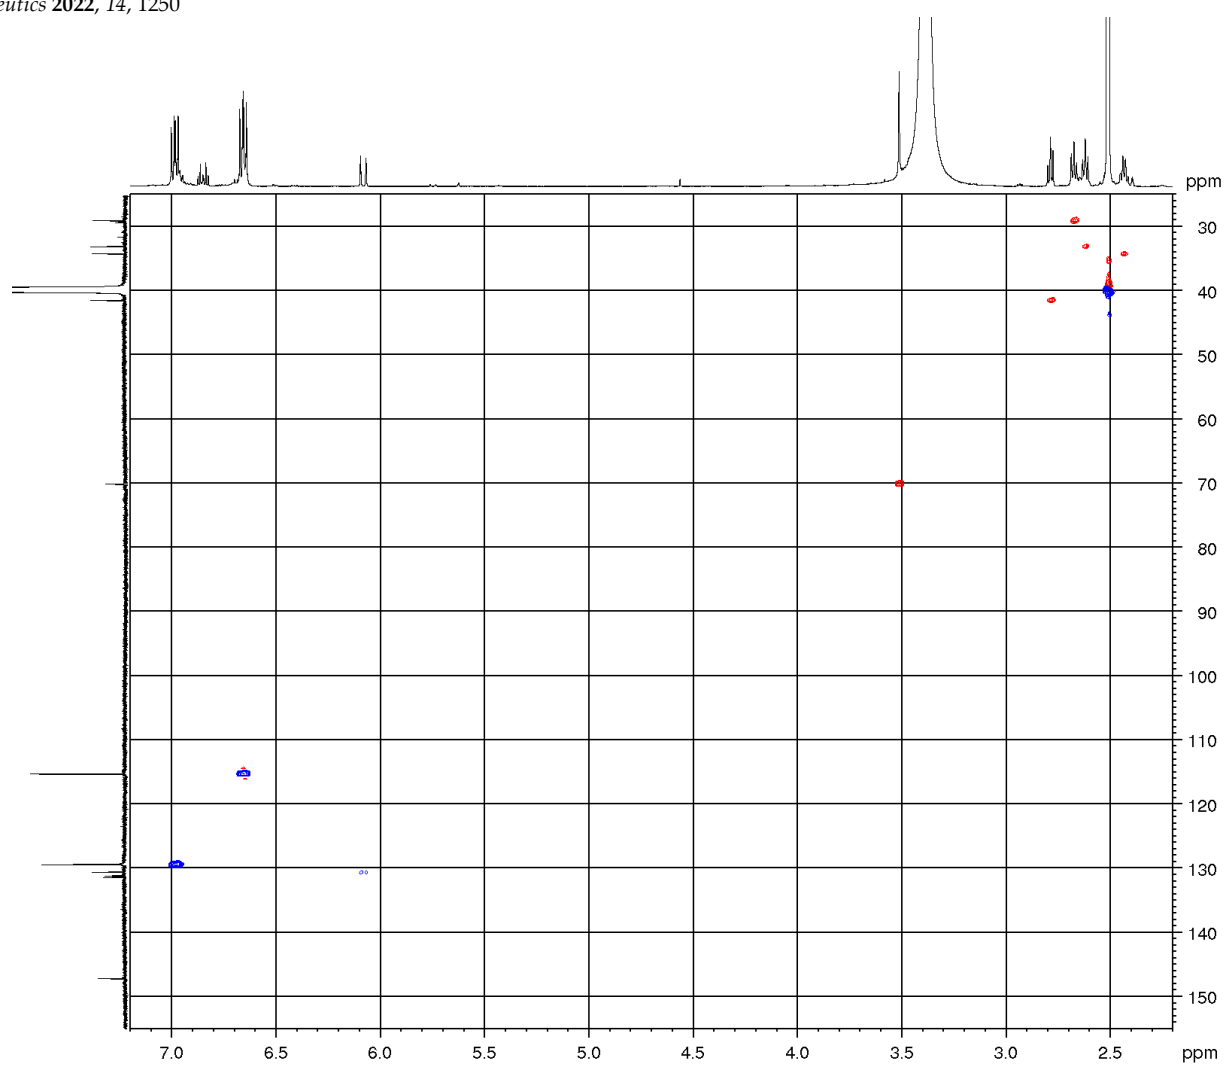

Figure S15. HSQC spectrum of platyphyllenone (5) ( $\text{DMSO}-d_6$ , 295 K).

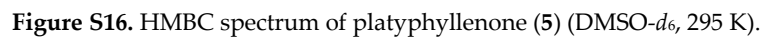

NMR data of compound **6** (alnusonol-11-O- $\beta$ -D-glucopyranoside):  $^1\text{H}$  NMR (DMSO- $d_6$ , 600 MHz, 295 K):  $\delta$  6.98 (m, 1H, H-15), 6.96 (m, 1H, H-5), 6.71 (d,  $^3J_{\text{H,H}}=8.2$  Hz, 1H, H-4), 6.70 (d,  $^3J_{\text{H,H}}=8.2$  Hz, 1H, H-16), 6.62 (d,  $^4J_{\text{H,H}}=2.0$  Hz, 1H, H-18), 6.49 (d,  $^4J_{\text{H,H}}=2.0$  Hz, 1H, H-19), 4.24 (d,  $^3J_{\text{H,H}}=7.8$  Hz, 1H, H<sub>Glc-1</sub>), 4.08 (m, 1H, H-11), 3.49 (dd,  $^2J_{\text{H,H}}=11.6$  Hz,  $^3J_{\text{H,H}}=2.0$  Hz, 1H, H<sub>Glc-6a</sub>), 3.40 (dd,  $^2J_{\text{H,H}}=11.6$  Hz,  $^3J_{\text{H,H}}=5.2$  Hz, 1H, H<sub>Glc-6b</sub>) 3.16 (m, 2H, H-10), 3.11 (m, 1H, H-8a), 3.10 (m, 1H, H<sub>Glc-3</sub>), 3.09 (m, 1H, H<sub>Glc-4</sub>), 2.99 (m, 1H, H<sub>Glc-5</sub>), 2.98 (m, 1H, H-13a), 2.91 (m, 1H, H-8b), 2.91 (m, 1H, H-6a), 2.88 (m, 1H, H<sub>Glc-2</sub>), 2.81 (m, 1H, H-7b), 2.68 (m, 1H, H-13b), 2.22 (m, 1H, H-12a), 1.89 (m, 1H, H-12b).  $^{13}\text{C}$  NMR (DMSO- $d_6$ , 150 MHz, 295 K):  $\delta$  210.5 (C-9), 153.2 (C-3), 153.0 (C-17), 133.2 (C-19), 132.4 (C-18), 130.5 (C-14), 129.5 (C-6), 129.3 (C-15), 128.2 (C-5), 126.4 (C-1, C-2), 116.4 (C-16), 116.3 (C-4), 102.2 (C<sub>Glc-1</sub>), 76.9 (C<sub>Glc-4</sub>), 76.4 (C<sub>Glc-5</sub>), 74.8 (C-11), 73.7 (C<sub>Glc-2</sub>), 70.1 (C<sub>Glc-3</sub>), 61.2 (C<sub>Glc-6</sub>), 51.5 (C-10), 41.6 (C-8), 33.8 (C-12), 28.0 (C-13), 26.4 (C-7).

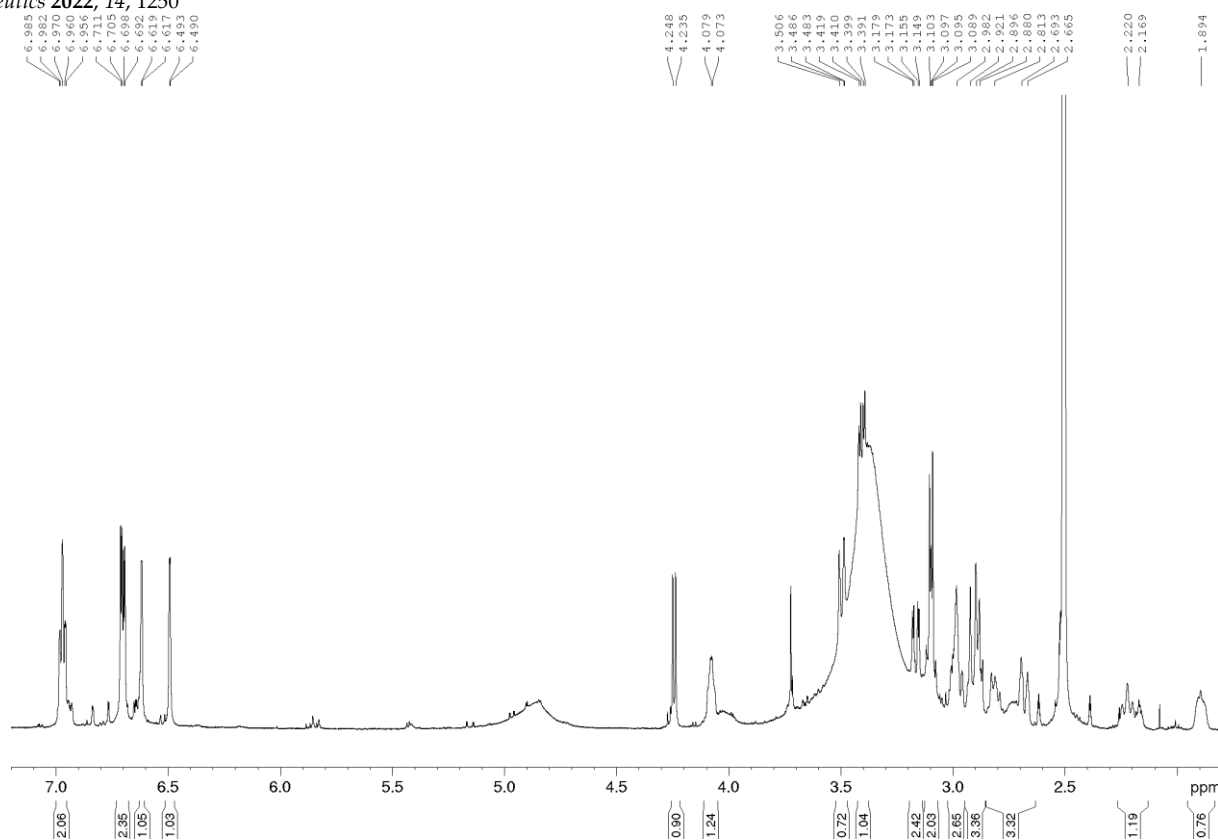

Figure S17. <sup>1</sup>H NMR spectrum of alnusonol-11-O-β-D-glucopyranoside (6) (DMSO-*d*<sub>6</sub>, 295 K).

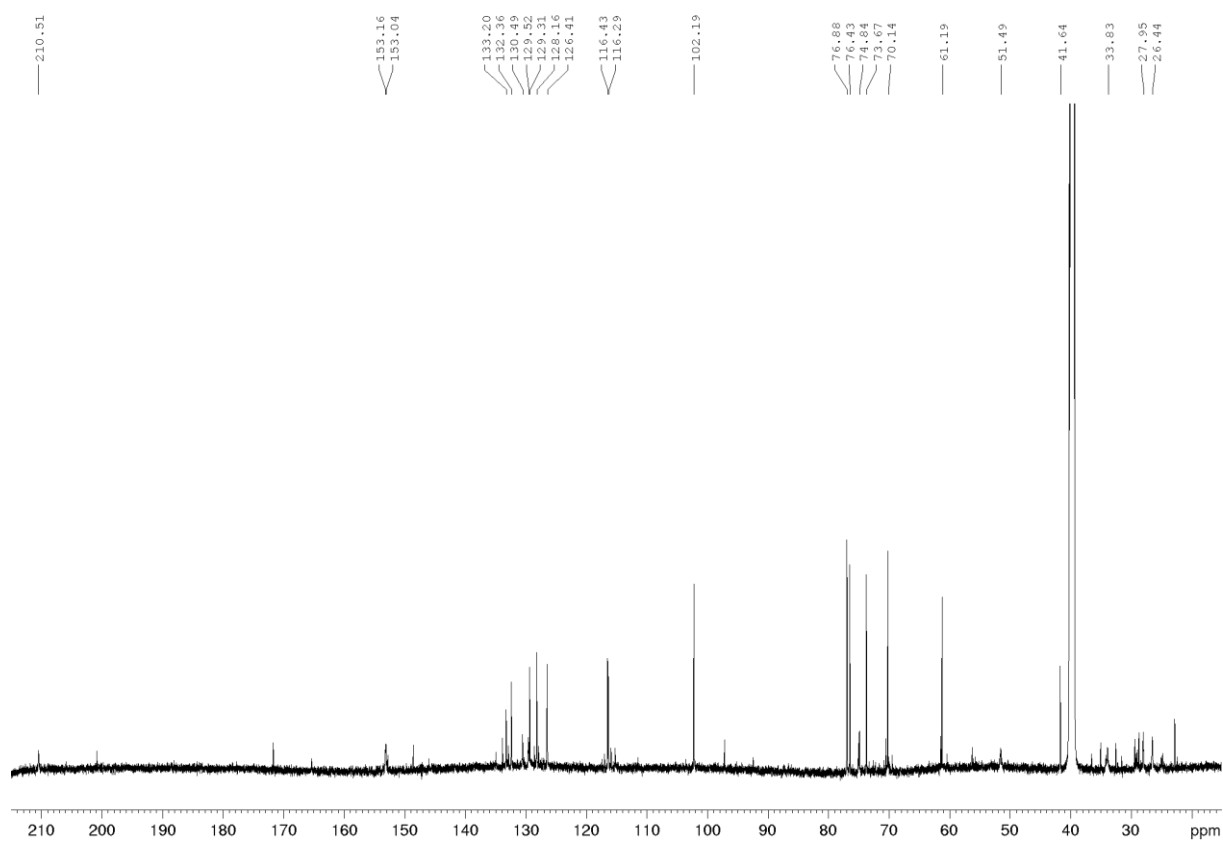

Figure S18. <sup>13</sup>C NMR spectrum of alnusonol-11-O-β-D-glucopyranoside (6) (DMSO-*d*<sub>6</sub>, 295 K).

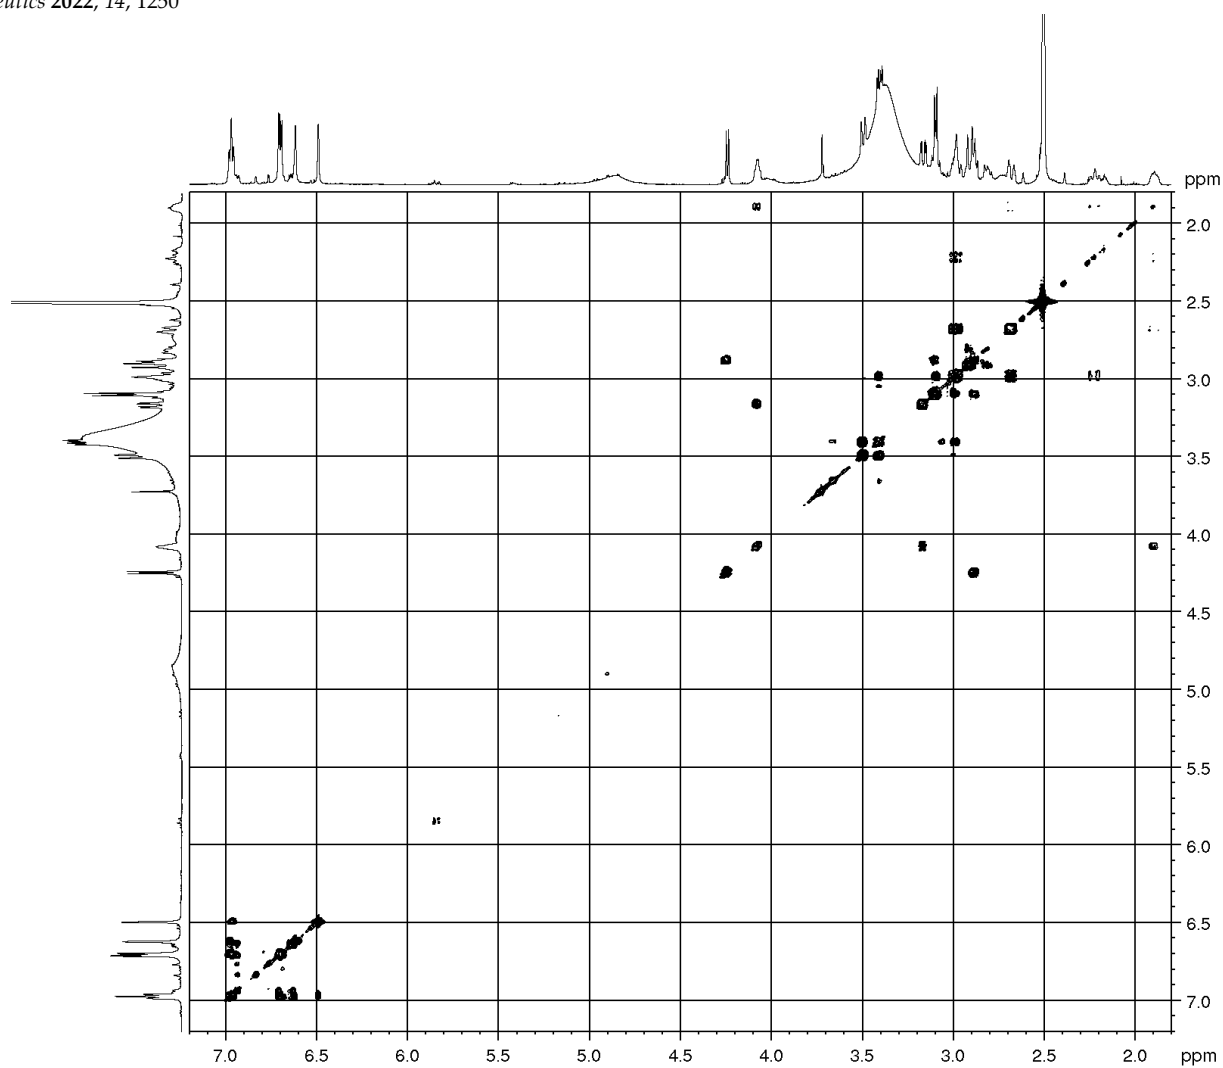

Figure S19. COSY spectrum of alnusunol-11-O- $\beta$ -D-glucopyranoside (**6**) (DMSO- $d_6$ , 295 K).

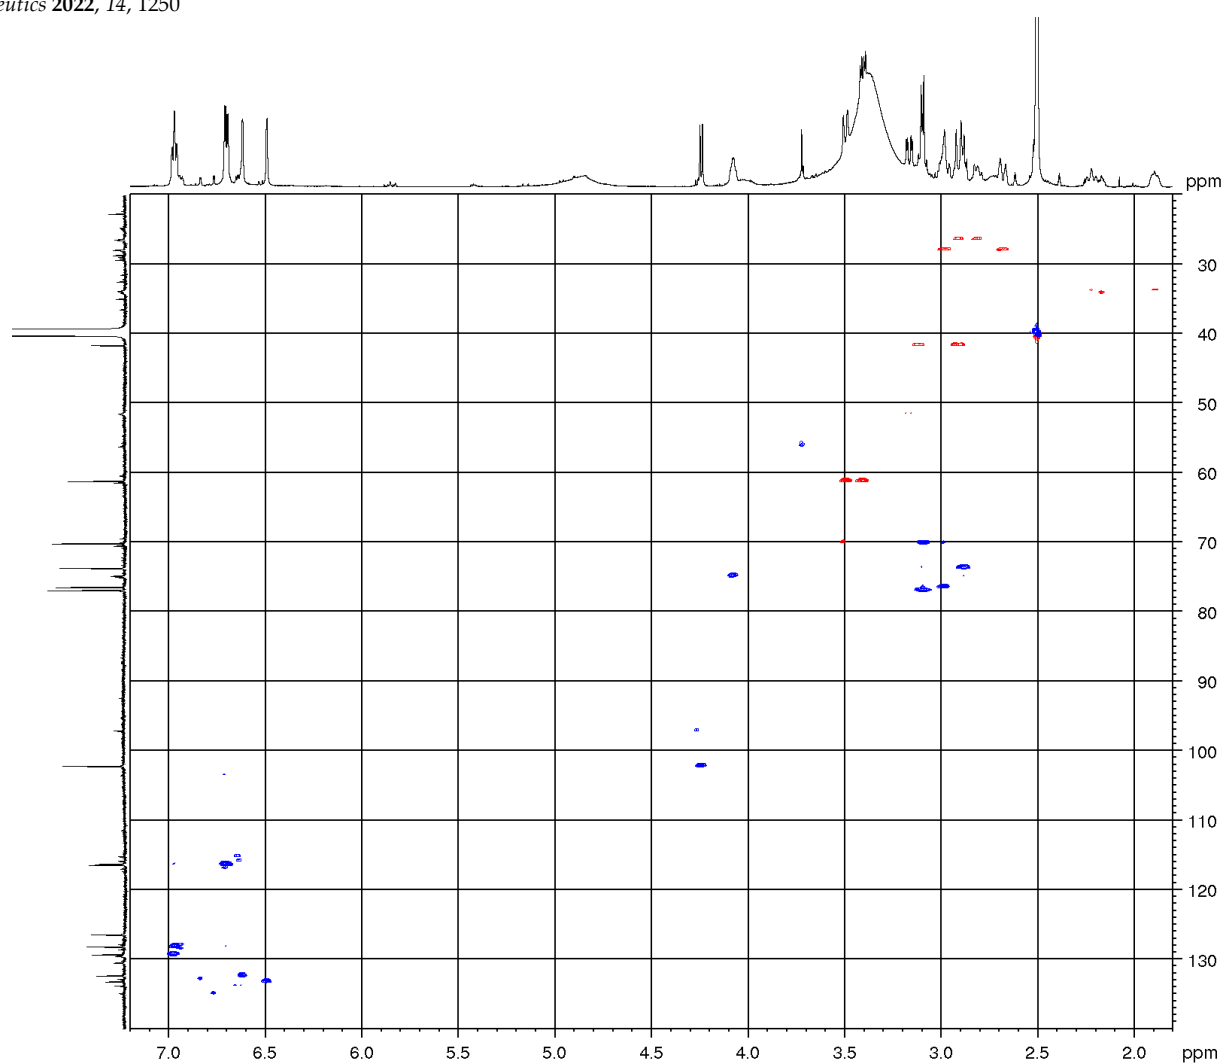

Figure S20. HSQC spectrum of alnusunol-11-*O*- $\beta$ -D-glucopyranoside (**6**) ( $\text{DMSO}-d_6$ , 295 K).

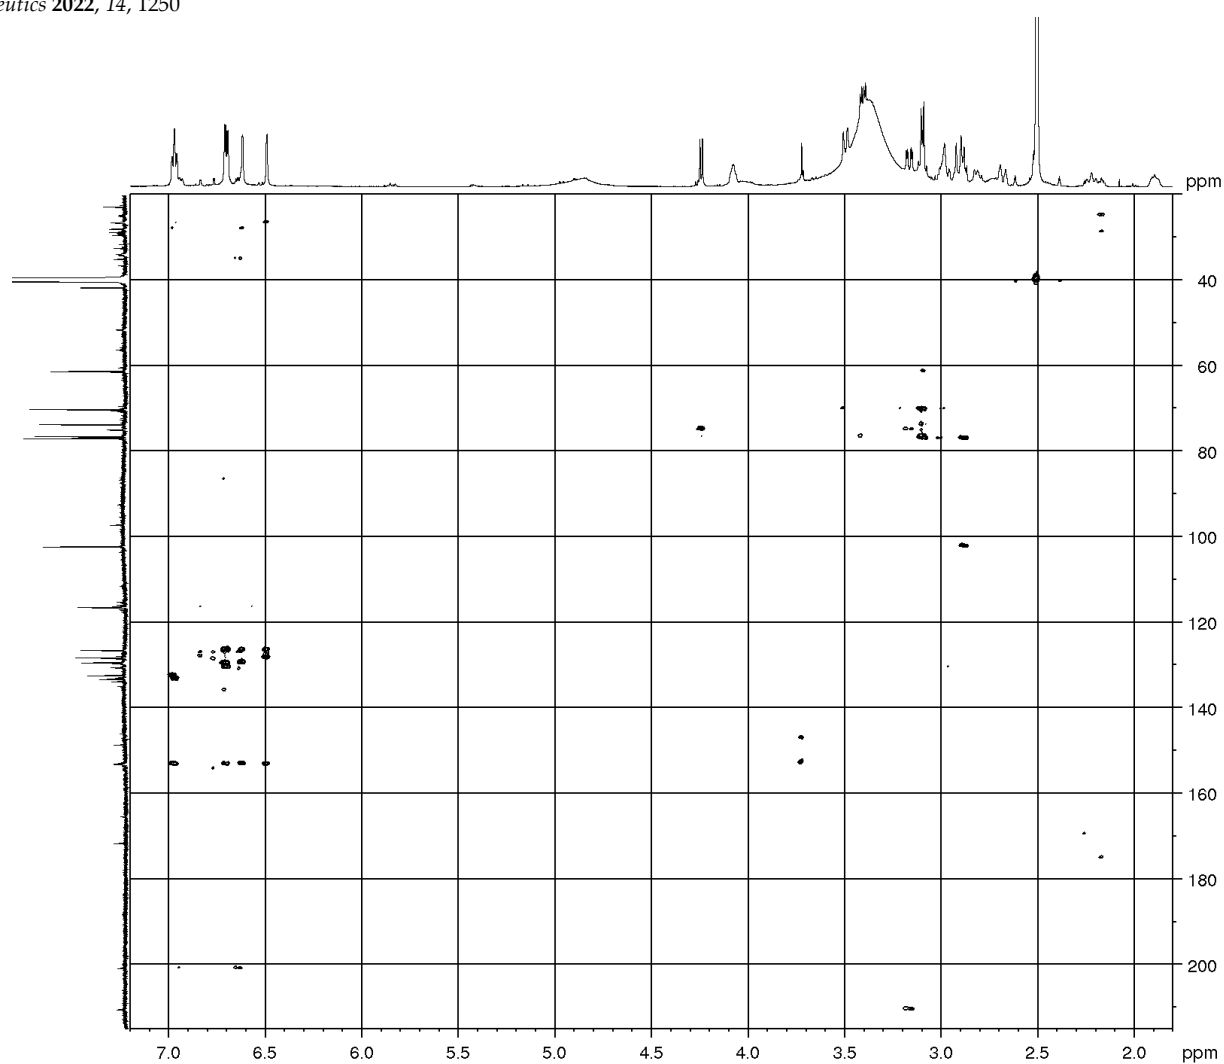

Figure S21. HMBC spectrum alnusonol-11-*O*- $\beta$ -D-glucopyranoside (**6**) (DMSO-*d*<sub>6</sub>, 295 K).

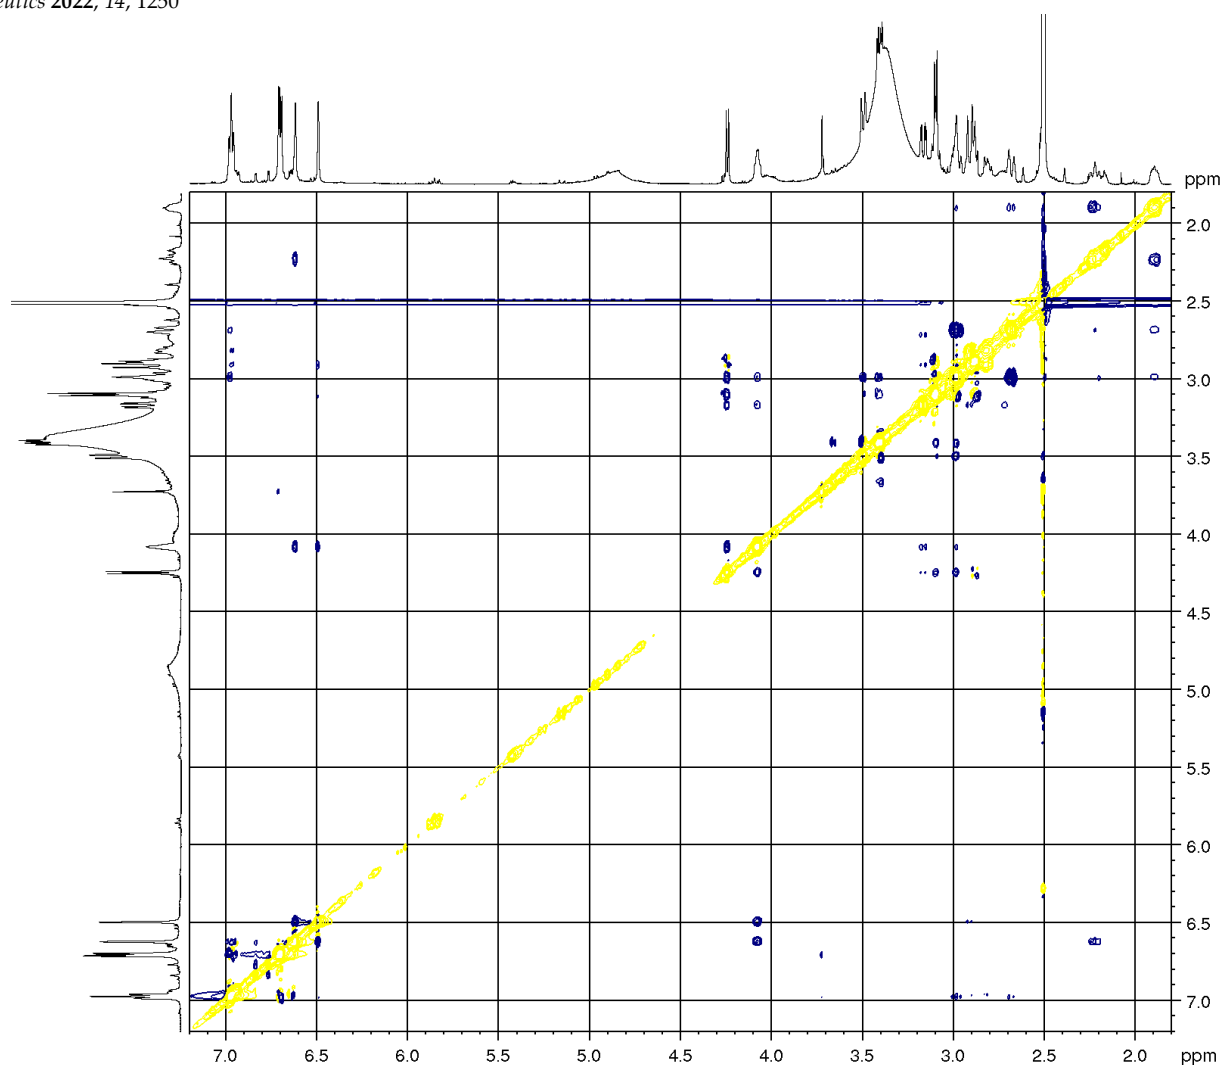

**Figure S22.** ROESY spectrum of alnusonol-11-O-β-D-glucopyranoside (**6**) (DMSO-*d*<sub>6</sub>, 295 K).

NMR data of compound **7** (alnusone): <sup>1</sup>H NMR (DMSO-*d*<sub>6</sub>, 600 MHz, 333 K): δ 6.95 (dt, <sup>2</sup>J<sub>H,H</sub>=15.5 Hz, <sup>3</sup>J<sub>H,H</sub>=7.5 Hz, H-11), 6.82 (m, 1H, H-19), 6.81 (m, 1H, H-18), 6.78 (m, 1H, H-15), 6.77 (m, 1H, H-5), 6.60 (dt, <sup>2</sup>J<sub>H,H</sub>=15.5 Hz, <sup>4</sup>J<sub>H,H</sub>=1.2 Hz, H-10), 6.49 (d, <sup>3</sup>J<sub>H,H</sub>=7.9 Hz, 1H, H-4), 6.42 (d, <sup>3</sup>J<sub>H,H</sub>=7.9 Hz, 1H, H-16), 2.98 (m, 2H, H-7), 2.80 (m, 2H, H-13), 2.70 (m, 2H, H-8), 2.53 (m, 2H, H-12). <sup>13</sup>C NMR (DMSO-*d*<sub>6</sub>, 150 MHz, 333 K): δ 200.6 (C-9), 148.3 (C-11), 133.5 (C-10), 133.1 (C-18), 131.7 (C-19), 127.4 (C-15), 126.7 (C-5), 117.6 (C-4), 116.1 (C-16), 39.8 (C-8), 34.9 (C-12), 32.5 (C-13), 29.5 (C-7). (The C-1, C-2, C-3, C-6, C-14 and C-17 signals were broad even on 333 K.)

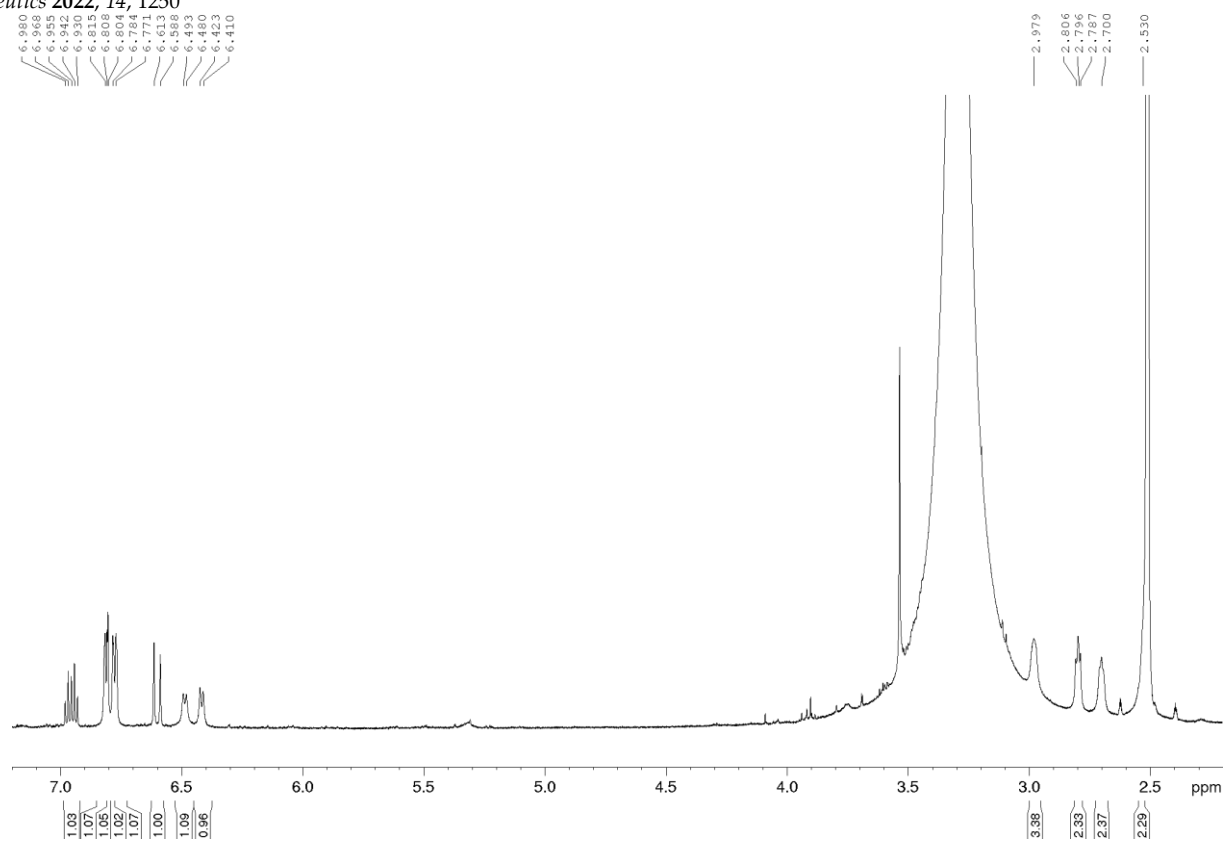

Figure S23. <sup>1</sup>H NMR spectrum of alnusone (7) (DMSO-*d*<sub>6</sub>, 333 K).

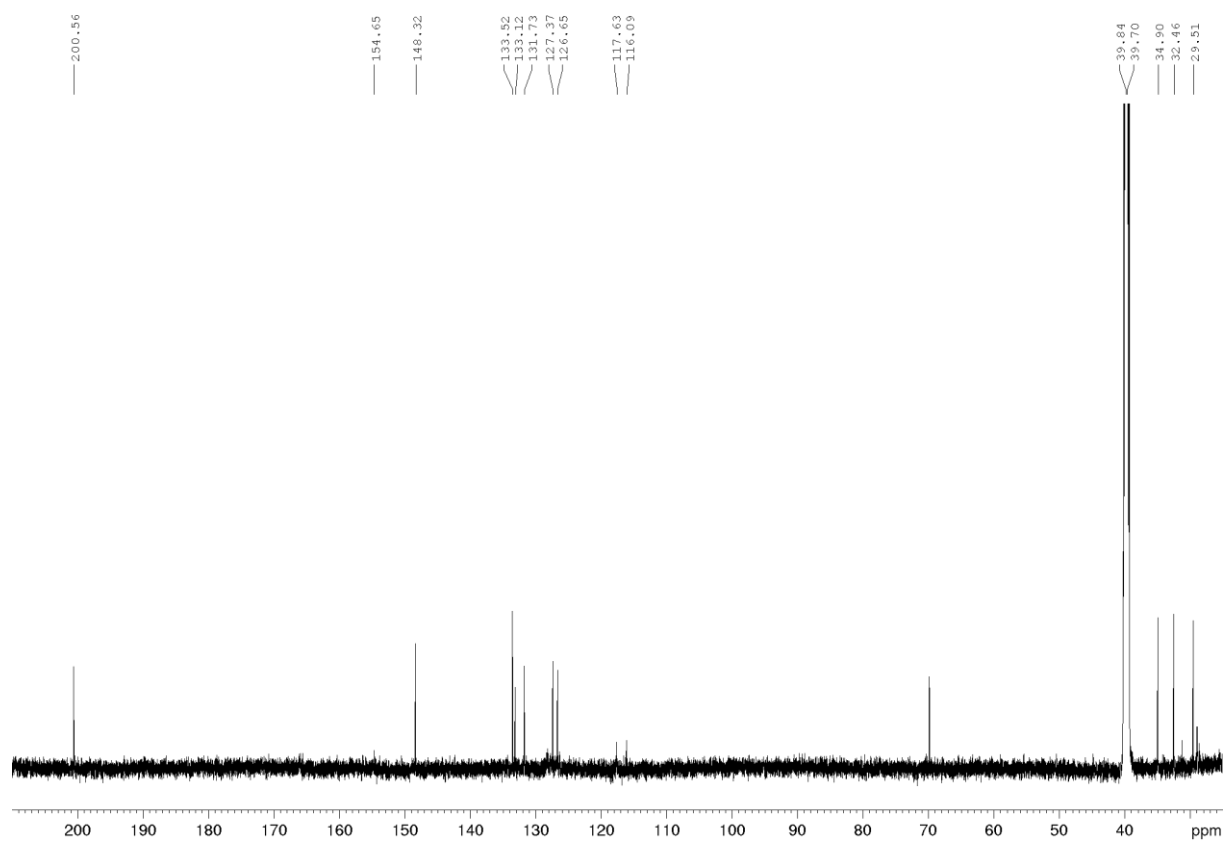

Figure S24. <sup>13</sup>C NMR spectrum of alnusone (7) (DMSO-*d*<sub>6</sub>, 333 K).

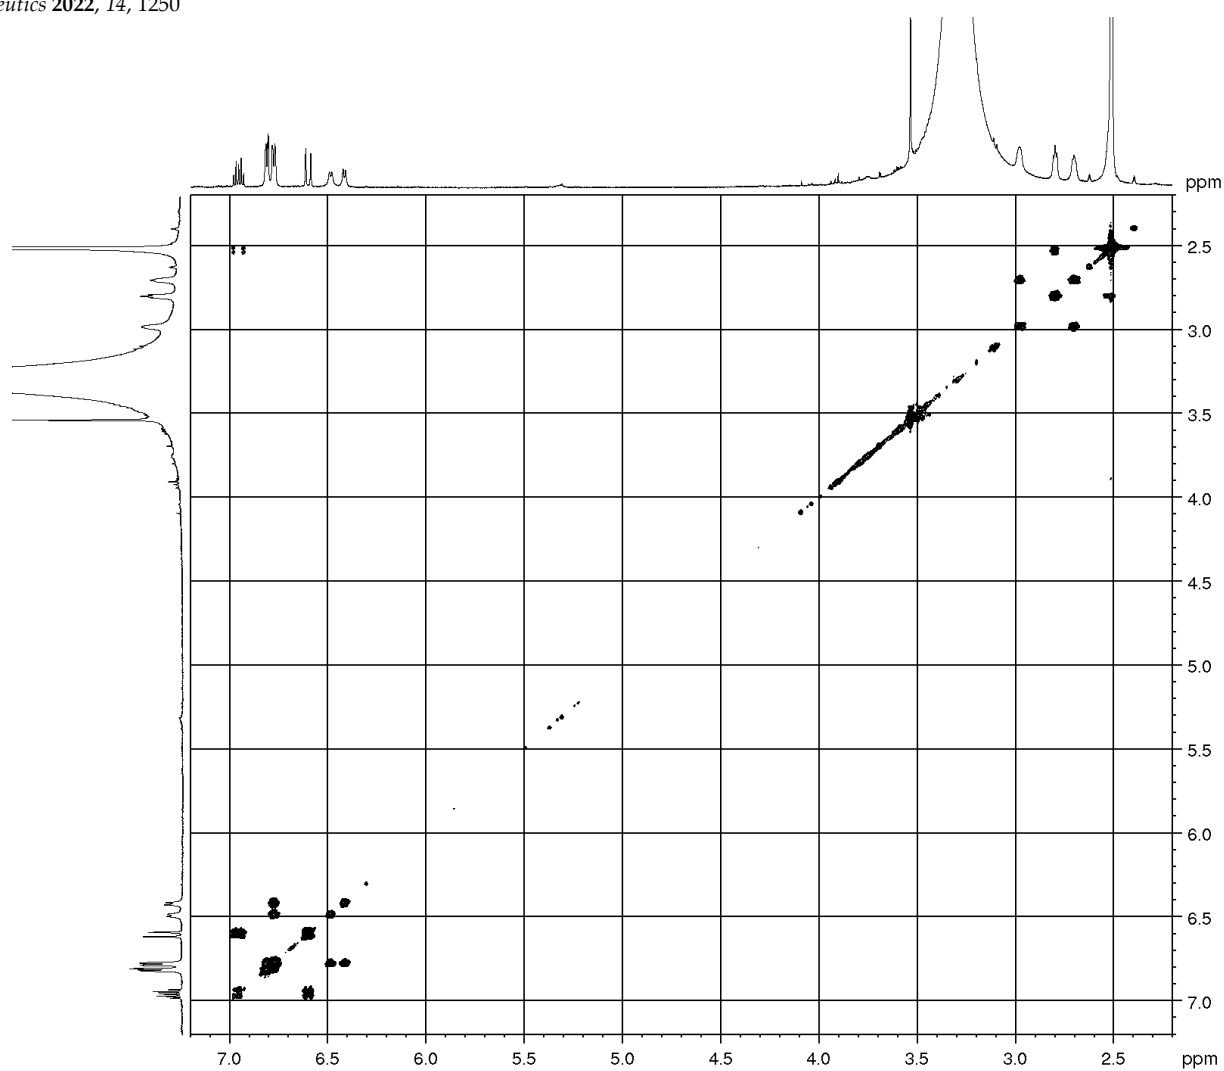

Figure S25. COSY spectrum of alnusone (7) (DMSO-*d*<sub>6</sub>, 333 K).

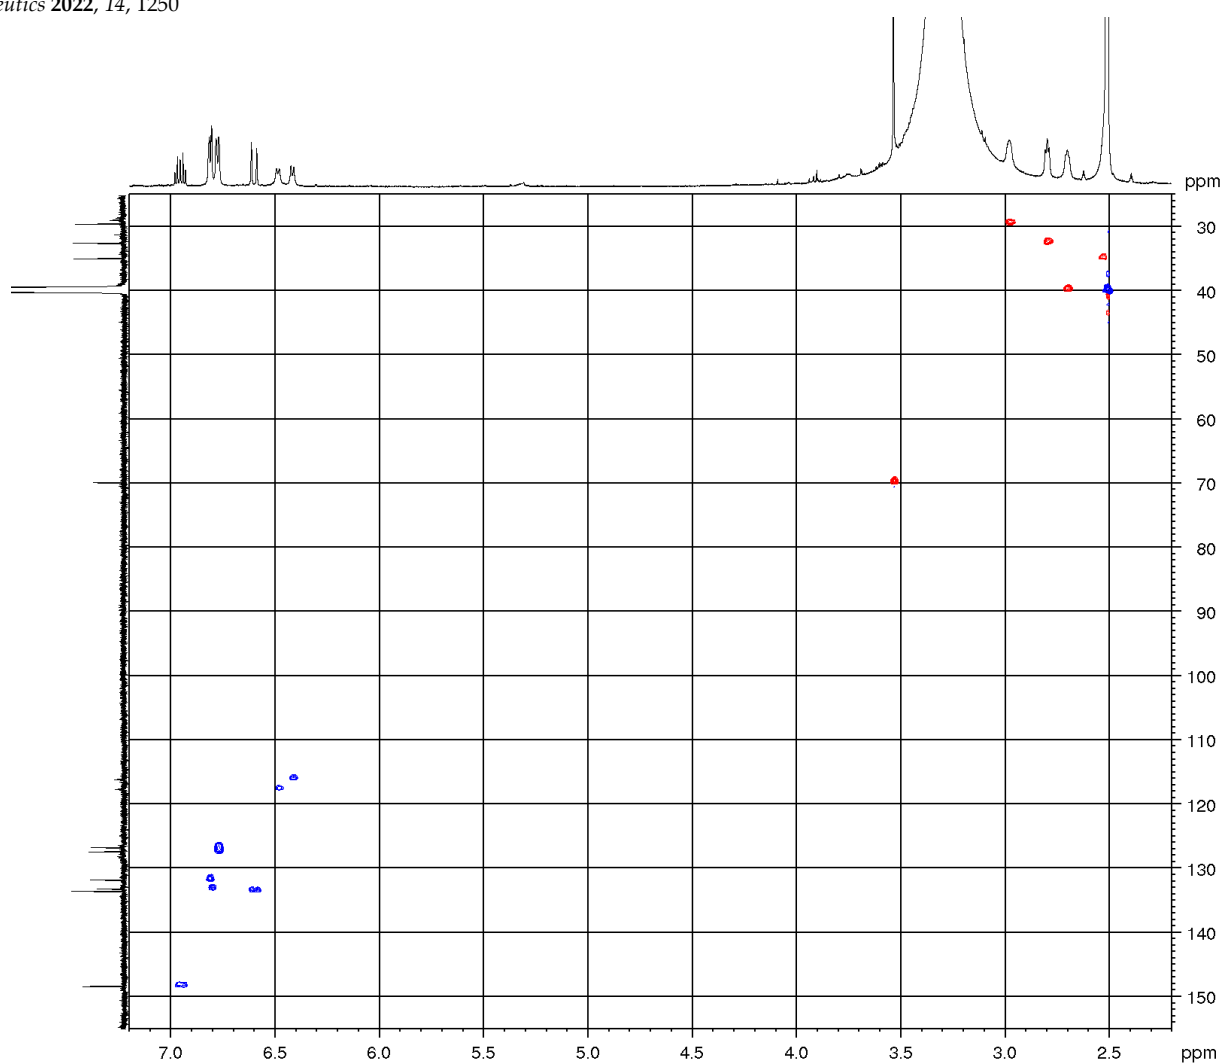

Figure S26. HSQC spectrum of alnusone (7) ( $\text{DMSO}-d_6$ , 333 K).

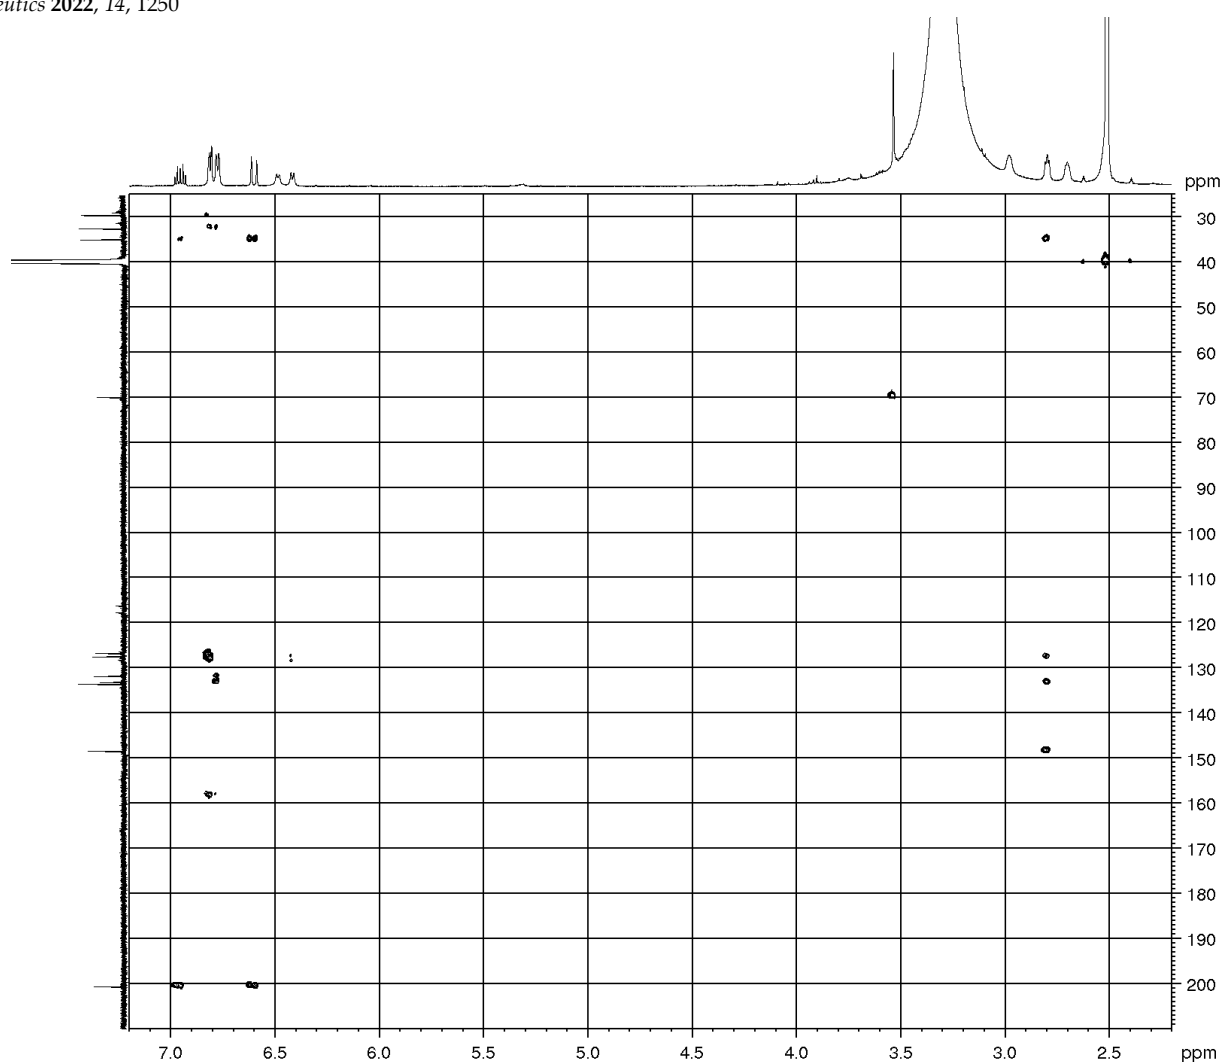

Figure S27. HMBC spectrum of alnusone (7) (DMSO- $d_6$ , 333 K).

NMR data of compound 8 (giffonin F):  $^1\text{H}$  NMR (methanol- $d_4$ , 600 MHz, 295 K):  $\delta$  7.48 (dd,  $^3J_{\text{H,H}}=8.2$  Hz,  $^4J_{\text{H,H}}=2.0$  Hz, 1H, H-15), 7.16 (dd,  $^3J_{\text{H,H}}=8.2$  Hz,  $^4J_{\text{H,H}}=2.0$  Hz, 1H, H-16), 7.08 (dd,  $^3J_{\text{H,H}}=8.2$  Hz,  $^4J_{\text{H,H}}=2.0$  Hz, 1H, H-19), 6.94 (dd,  $^3J_{\text{H,H}}=8.2$  Hz,  $^4J_{\text{H,H}}=2.0$  Hz, 1H, H-18), 6.41 (d,  $^3J_{\text{H,H}}=12.1$  Hz, 1H, H-7), 5.29 (dd,  $^3J_{\text{H,H}}=12.1$  Hz,  $^3J_{\text{H,H}}=9.1$  Hz, 1H, H-8), 4.84 (s, 1H, H-6), 4.29 (t,  $^3J_{\text{H,H}}=9.8$  Hz, 1H, H-9), 3.99 (s, 3H, OCH<sub>3</sub>-2), 3.67 (s, 3H, OCH<sub>3</sub>-4), 3.06 (m, 1H, H-13a), 2.99 (td,  $^2J_{\text{H,H}}=12.5$  Hz,  $^3J_{\text{H,H}}=5.4$  Hz, 1H, H-13b), 2.81 (td,  $^2J_{\text{H,H}}=12.5$  Hz,  $^3J_{\text{H,H}}=5.4$  Hz, 1H, H-12a), 2.48 (m, 1H, H-12b), 2.45 (m, 1H, H-10a), 1.72 (m, 1H, H-10b).  $^{13}\text{C}$  NMR (methanol- $d_4$ , 150 MHz, 295 K):  $\delta$  215.6 (C-11), 156.6 (C-17), 152.1 (C-1), 145.2 (C-3), 142.2 (C-4), 138.8 (C-14), 138.3 (C-2), 134.0 (C-19), 133.2 (C-8), 130.7 (C-15), 125.3 (C-5), 125.1 (C-16), 124.9 (C-7), 124.0 (C-18), 108.5 (C-6), 65.3 (C-9), 61.6 (OCH<sub>3</sub>-2), 61.5 (OCH<sub>3</sub>-4), 51.7 (C-10), 45.2 (C-12), 33.2 (C-13).

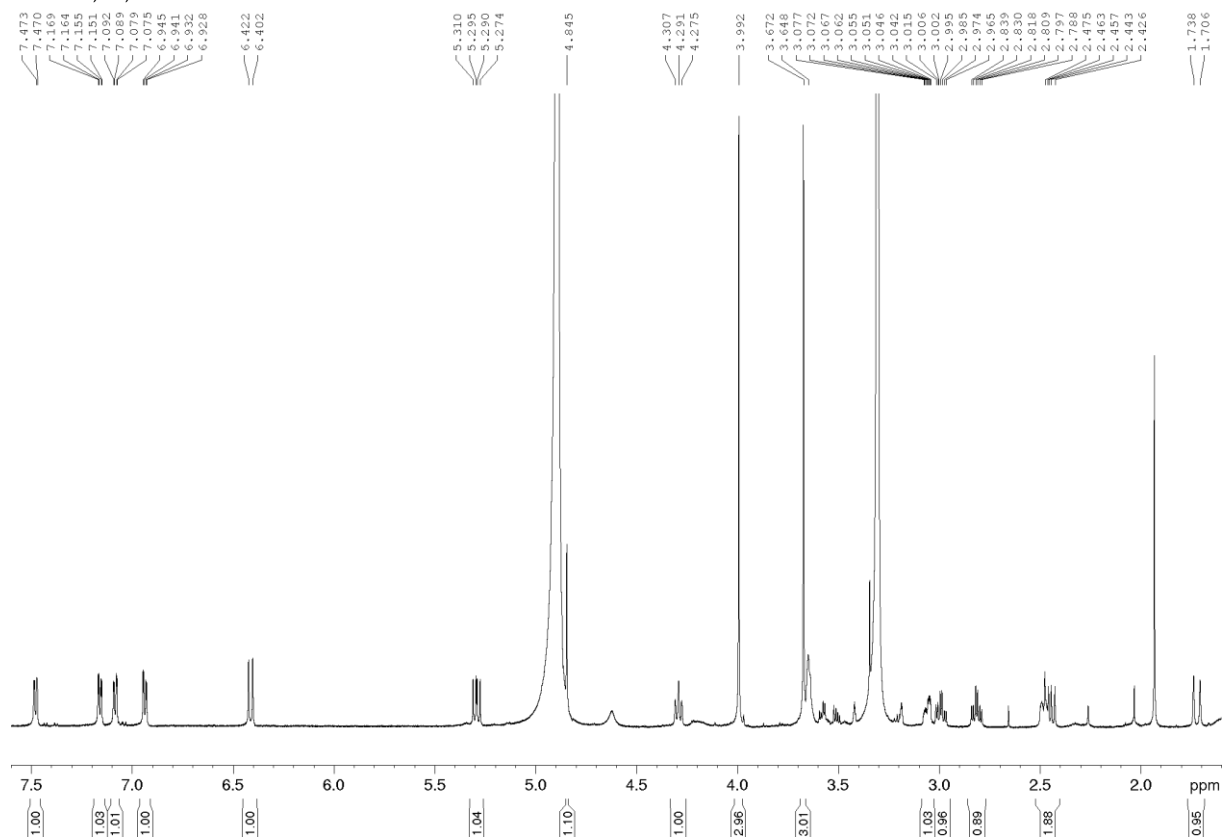Figure S28. <sup>1</sup>H NMR spectrum of giffonin F (8) (methanol-*d*<sub>4</sub>, 295 K).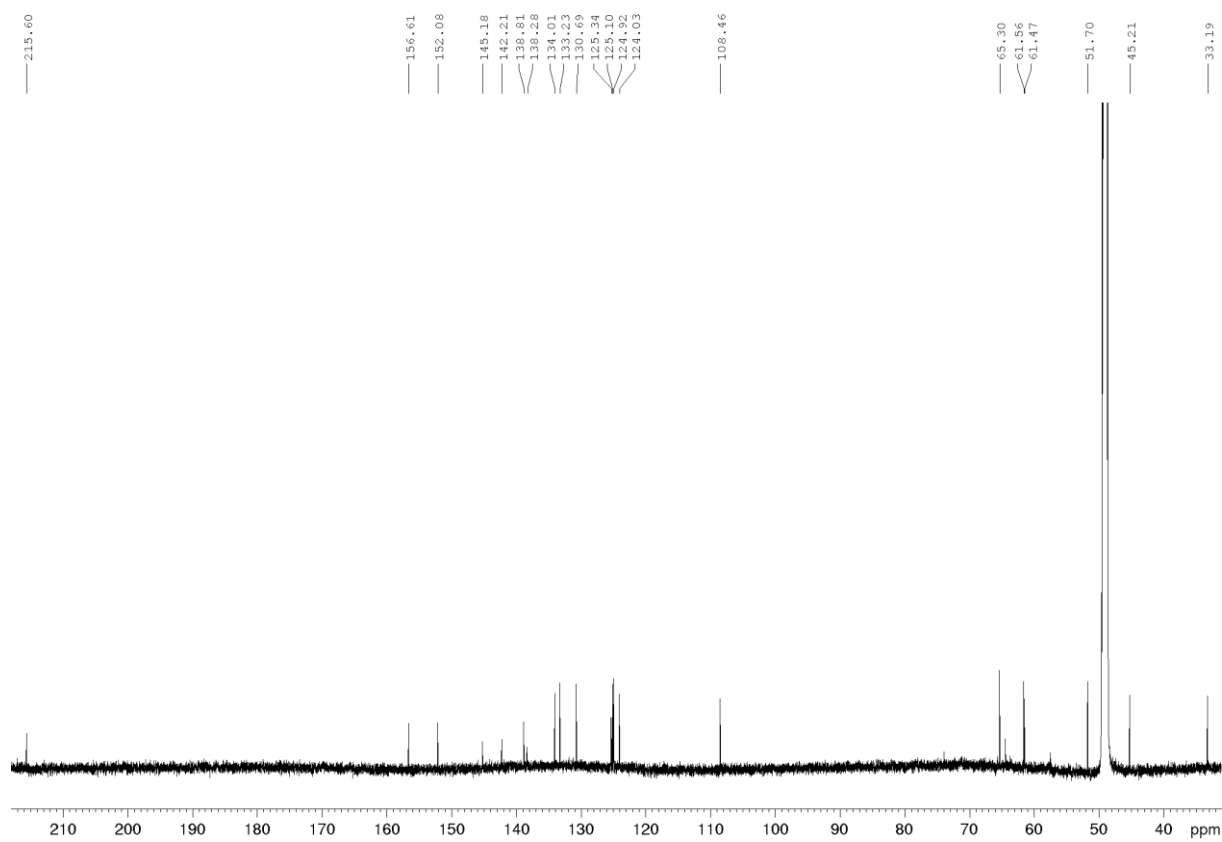Figure S29. <sup>13</sup>C NMR spectrum of giffonin F (8) (methanol-*d*<sub>4</sub>, 295 K).

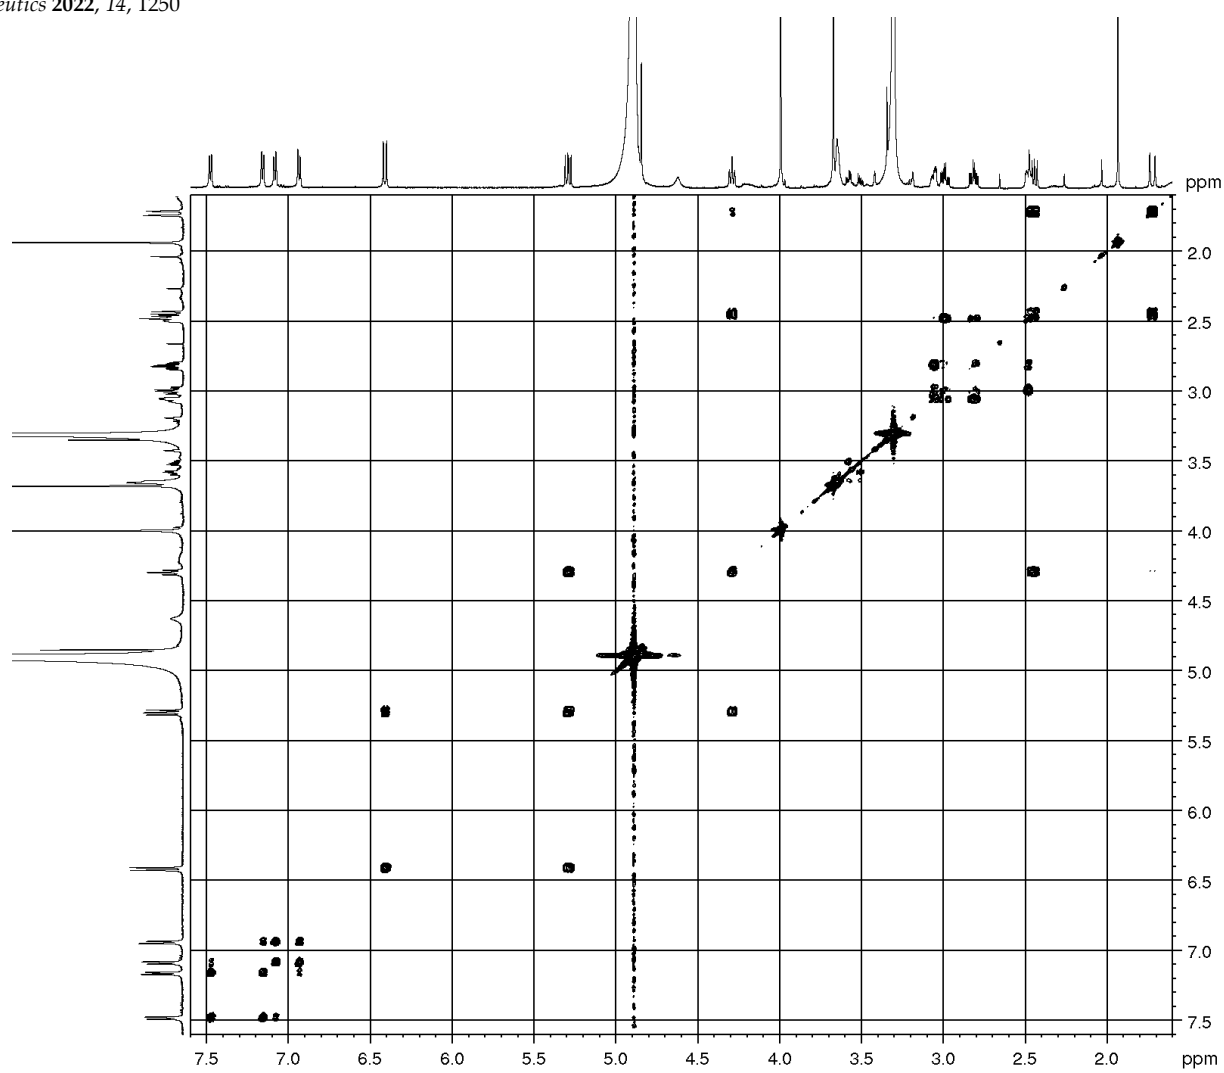

Figure S30. COSY spectrum of giffonin F (8) (methanol- $d_4$ , 295 K).

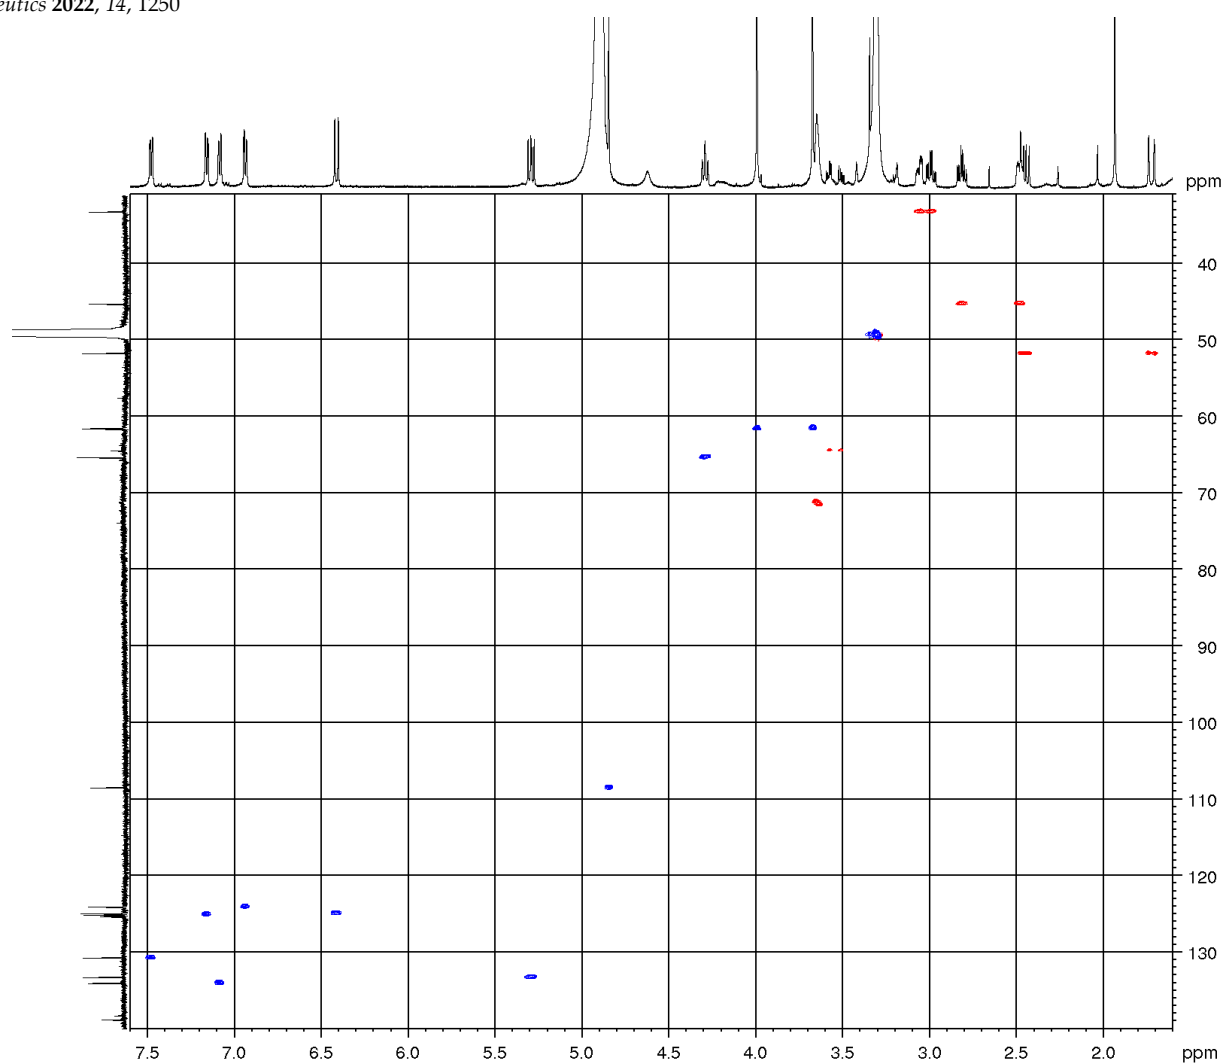

Figure S31. HSQC spectrum of giffonin F (8) (methanol- $d_4$ , 295 K).

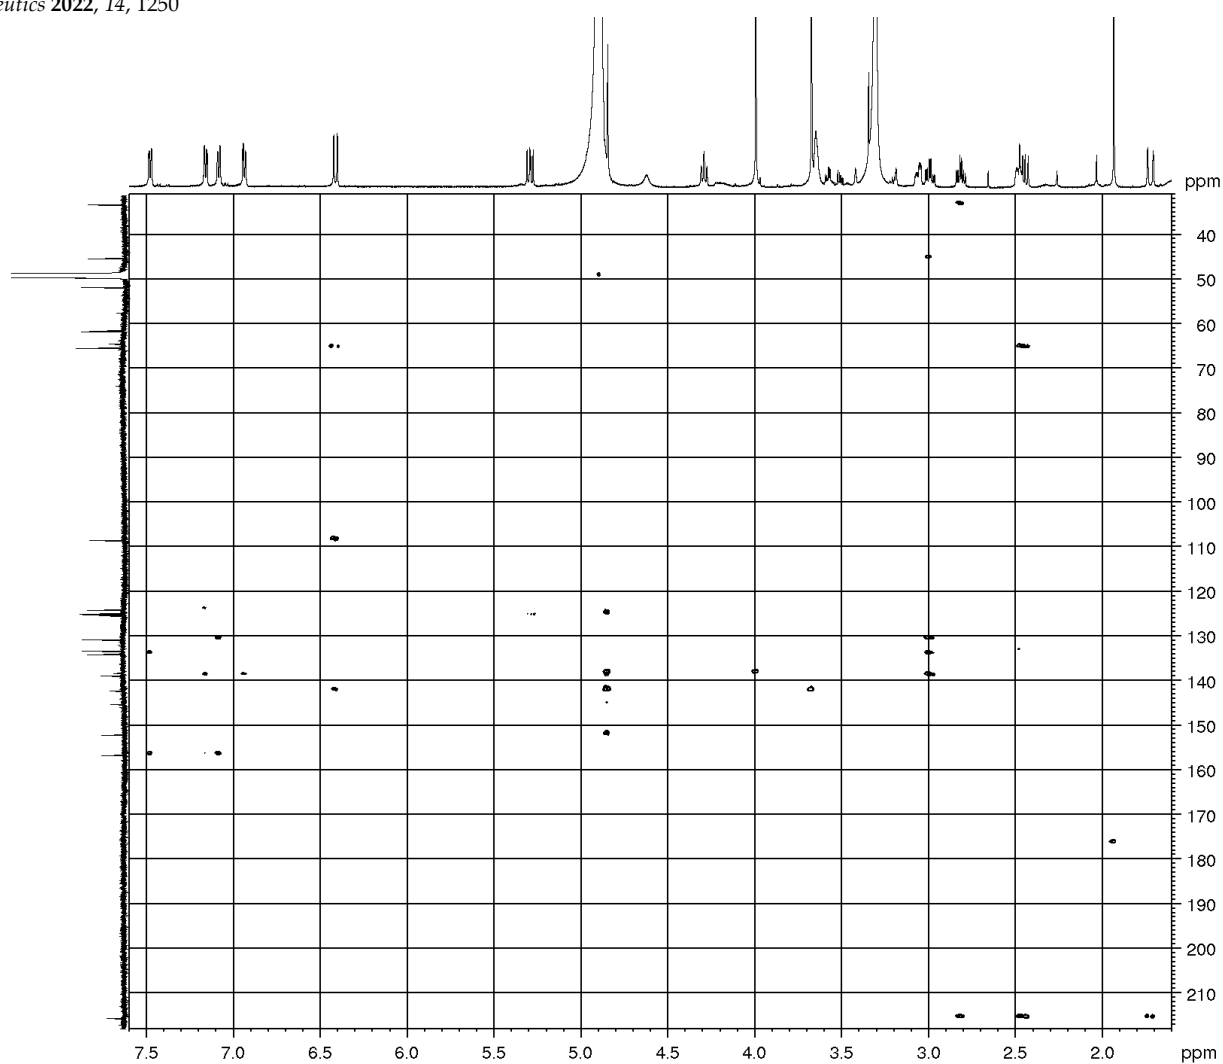

Figure S32. HMBC spectrum of giffonin F (8) (methanol- $d_4$ , 295 K).

NMR data of compound **9** (carpinontriol B):  $^1\text{H}$  NMR (methanol- $d_4$ , 600 MHz, 298 K):  $\delta$  7.07 (dd,  $^3J_{\text{H,H}}=8.2$  Hz,  $^4J_{\text{H,H}}=1.9$  Hz, 1H, H-5), 7.00 (dd,  $^3J_{\text{H,H}}=8.2$  Hz,  $^4J_{\text{H,H}}=1.9$  Hz, 1H, H-15), 6.80 (d,  $^3J_{\text{H,H}}=8.2$  Hz, 1H, H-4), 6.77 (d,  $^3J_{\text{H,H}}=8.2$  Hz, 1H, H-16), 6.65 (bd,  $^4J_{\text{H,H}}=1.9$  Hz, 1H, H-18), 6.36 (bd,  $^4J_{\text{H,H}}=1.9$  Hz, 1H, H-19), 4.71 (dd,  $^3J_{\text{H,H}}=11.9$  Hz,  $^3J_{\text{H,H}}=4.4$  Hz, 1H, H-12), 4.22 (d,  $^3J_{\text{H,H}}=10.1$  Hz, 1H, H-10), 3.87 (d,  $^3J_{\text{H,H}}=10.1$  Hz, 1H, H-11), 3.51 (ddd,  $^2J_{\text{H,H}}=20.0$  Hz,  $^3J_{\text{H,H}}=12.5$  Hz,  $^3J_{\text{H,H}}=2.0$  Hz, 1H, H-8a), 3.14 (m, 1H, H-7a), 3.05 (dd,  $^2J_{\text{H,H}}=16.0$  Hz,  $^3J_{\text{H,H}}=4.3$  Hz, 1H, H-13a), 2.93 (m, 1H, H-8b), 2.89 (m, 1H, H-13b), 2.84 (m, 1H, H-7b).  $^{13}\text{C}$  NMR (methanol- $d_4$ , 150 MHz, 298 K):  $\delta$  215.6 (C-9), 153.0 (C-17), 152.1 (C-3), 135.1 (C-19), 135.0 (C-18), 131.4 (C-6), 130.7 (C-14), 130.7 (C-15), 129.5 (C-5), 127.6 (C-1), 126.7 (C-2), 117.0 (C-4, C-16), 78.8 (C-10), 69.8 (C-11), 68.7 (C-12), 37.6 (C-8), 37.1 (C-13), 25.3 (C-7).

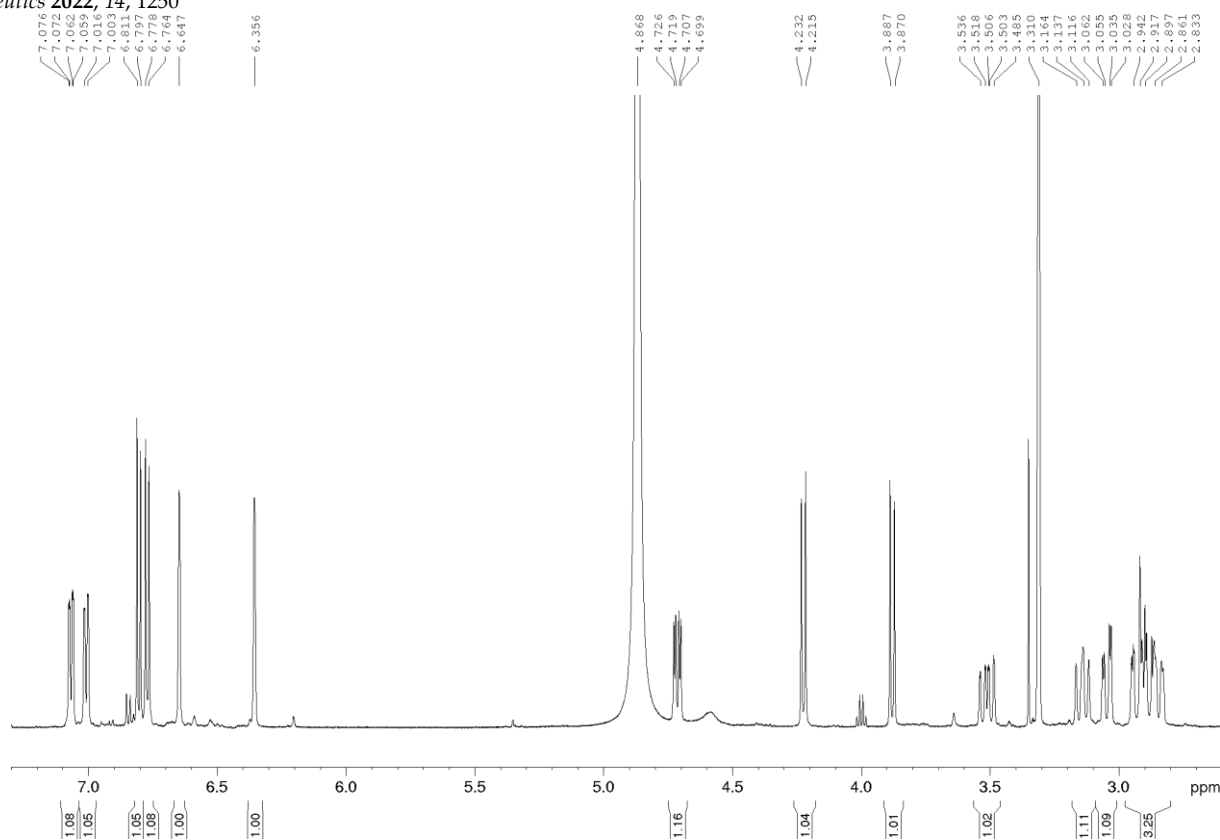

Figure S33. <sup>1</sup>H NMR spectrum of carpinontriol B (9) (methanol-*d*<sub>4</sub>, 298 K).

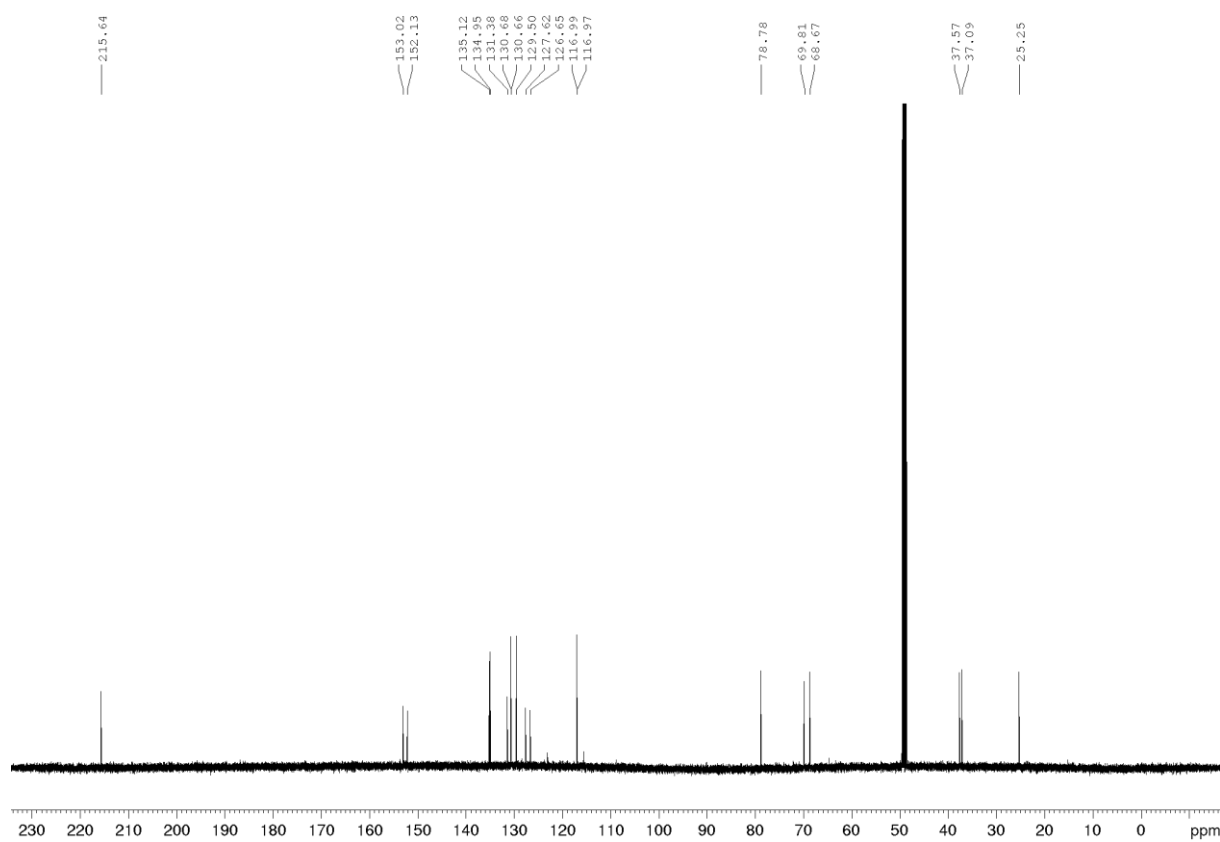

Figure S34. <sup>13</sup>C NMR spectrum of carpinontriol B (9) (methanol-*d*<sub>4</sub>, 298 K).

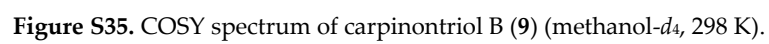

**Figure S35.** COSY spectrum of carpinontriol B (**9**) (methanol-*d*<sub>4</sub>, 298 K).

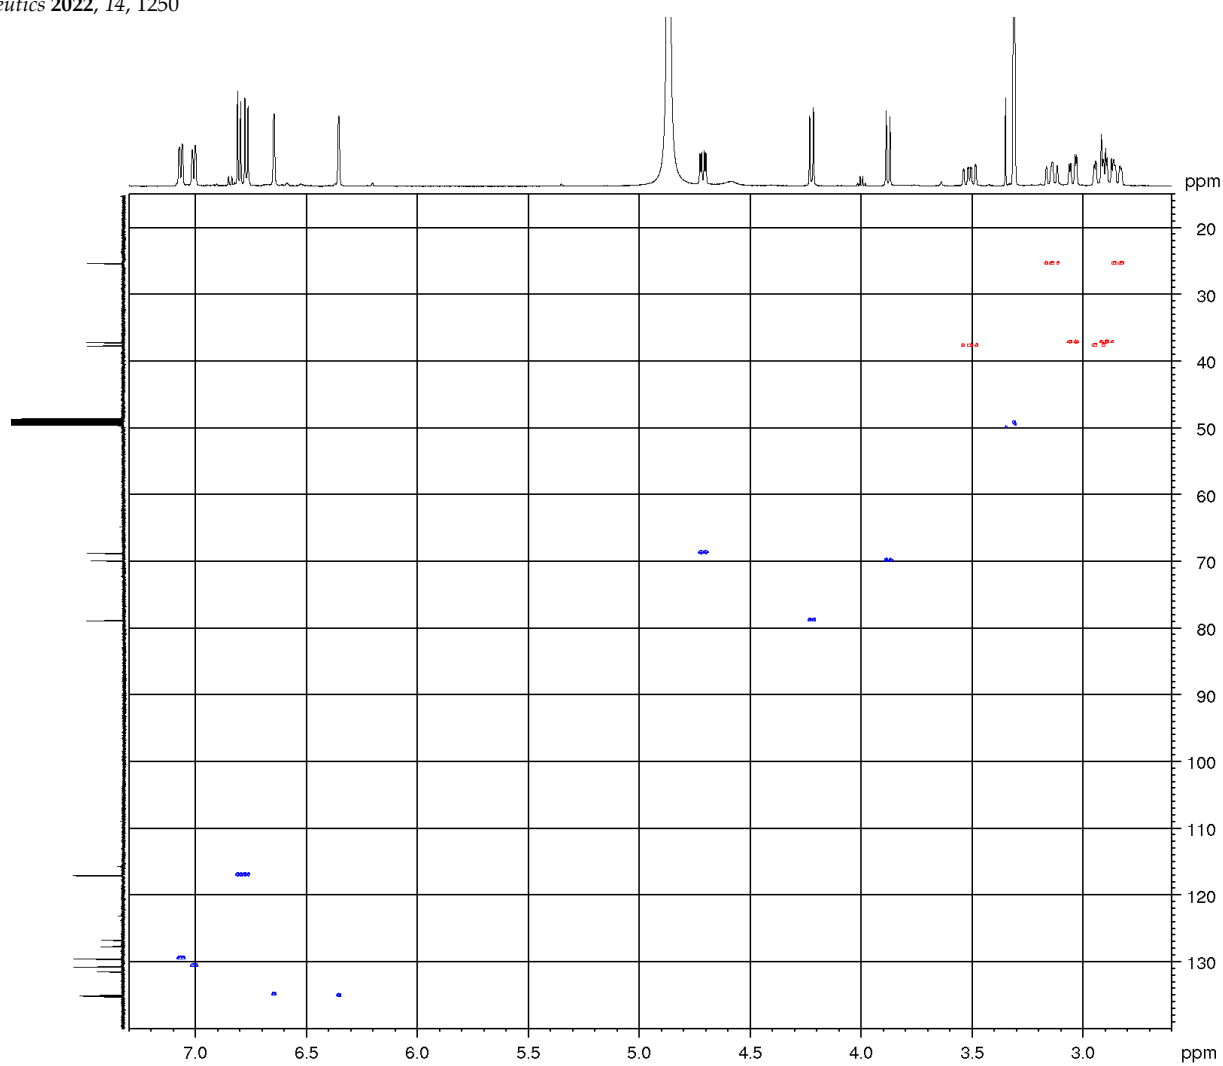

Figure S36. HSQC spectrum of carpinontriol B (9) (methanol- $d_4$ , 298 K).

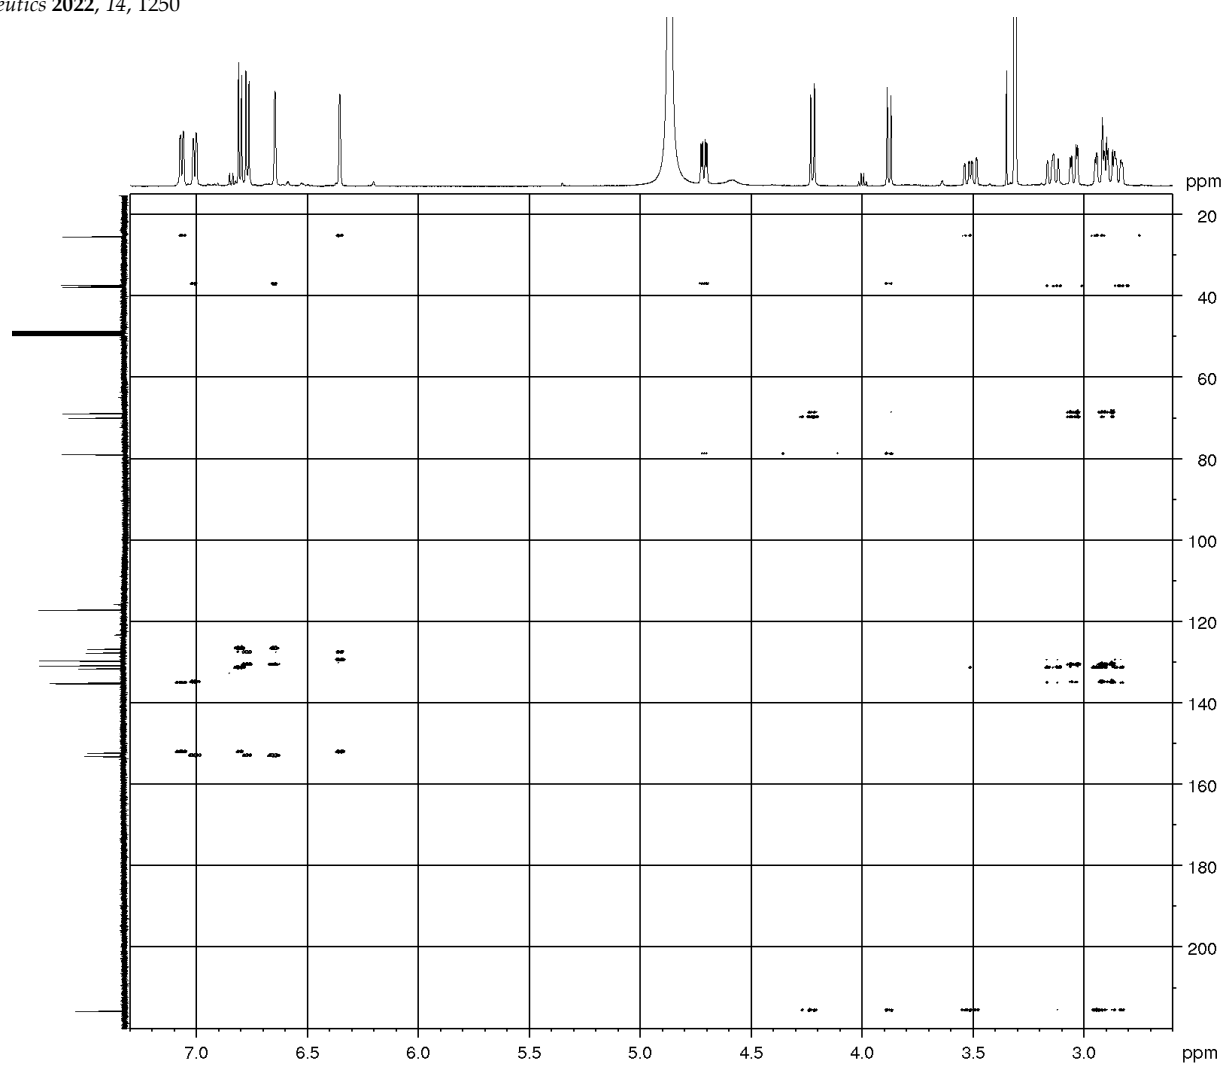

Figure S37. HMBC spectrum of carpinontriol B (9) (methanol- $d_4$ , 298 K).
